# Supplementary material for: Phenotypes associated with genes encoding drug targets are predictive of clinical trial side effects
Source: PubMed Central journal article supplement (PMC6450952; doi:10.1038/s41467-019-09407-3), 2019-04-05
Supplement: 41467_2019_9407_MOESM1_ESM.pdf [file 41467_2019_9407_MOESM1_ESM.pdf]

**Supplementary Information for**

**Nguyen et al., “Phenotypes associated with genes encoding drug targets are predictive of clinical trial side effects”**

|                                     |         |        |        |        |        |        |        |        |        |        |        |       |        |        |        |        |        |        |        |        |        |        |        |        |         |        |        |         |        |
|-------------------------------------|---------|--------|--------|--------|--------|--------|--------|--------|--------|--------|--------|-------|--------|--------|--------|--------|--------|--------|--------|--------|--------|--------|--------|--------|---------|--------|--------|---------|--------|
| gen_gwas_blood_no (798)             | 0.29*** | 1.08   | 0.79   | 1.24   | 0.44** | 1.79** | 2.08   | 0.9    | 1.03   | 0.39** | 0.65*  | 0.77  | 1.20*  | 0.38*  | 0.88   | 1.44** | 1.11   | 0.33** | 0.86   | 1.60** | 1.11   | 0.73*  | 1.15   | 0.76   | 2.12*** | 0.65*  | 0.63*  | 1.67**  | 1.34*  |
| gen_gwas_blood_eyes (194)           | 0.77*** | 1.82*  | 0.42** | 0.96   | 1.47   | 1.06   | 2.44   | 1.8*   | 0.67   | 0.31** | 0.56   | 0.37* | 0.23** | 0.55   | 0.37*  | 1.26   | 0.26   | 0.73   | 0.41** | 0.75   | 0.29   | 0.19   | 0.12   | 0.16   | 0.35    | 1.28   | 0.59   | 2.41*** |        |
| gen_gwas_congenital_no (916)        | 0.21*** | 1.14   | 0.66** | 1.20*  | 0.47** | 1.9**  | 1.43   | 1      | 0.87   | 0.61*  | 0.28   | 0.59  | 1.16   | 0.58** | 0.72*  | 1.03** | 1.04   | 0.52** | 0.86   | 1.07** | 1.11   | 0.71** | 1.13   | 0.76   | 2.12*** | 0.66** | 0.62** | 1.16    | 1.79** |
| gen_gwas_congenital_eyes (76)       | 2.44*** | 2.21*  | 0.41*  | 0.79   | 0.34** | 0.77   | 1.95   | 1.7*   | 1.22   | 0.32** | 0.52** | 1.54  | 0.46   | 1.73   | 1.2    | 1.7    | 1.57   | 1.79*  | 0.98   | 0.22** | 0.44*  | 1.18   | 0.89   | 1.54   | 1.11    | 1.4    | 2.6**  | 2.43**  | 1.8*   |
| gen_gwas_ear_no (991)               | 0.24*** | 1.31   | 0.61** | 1.22*  | 0.59** | 1.62** | 1.69   | 1.1    | 0.9    | 0.84   | 0.99   | 0.65  | 1.03   | 0.65*  | 0.79*  | 1.85** | 1.08   | 0.57** | 0.84   | 1.42** | 0.99   | 0.73*  | 1.1    | 0.73   | 2.15*** | 0.69*  | 0.71   | 1.43*   | 2.05** |
| gen_gwas_ear_eyes (1)               | inf     | inf    | 0      | 0      | 0      | 0      | 0      | 0      | 0      | 0      | 0      | 0     | 0      | 0      | 0      | 0      | 0      | 0      | 0      | 0      | 0      | 0      | 0      | 0      | 0       | 0      | 0      | 0       | 0      |
| gen_gwas_endocrine_no (841)         | 1.96**  | 1.29   | 0.64** | 1.19   | 0.91** | 1.53** | 1      | 1.07   | 0.88   | 1.12   | 1.13   | 0.9   | 0.58** | 0.72   | 1      | 1.58*  | 1.11   | 0.95** | 0.96   | 1.43** | 0.68** | 0.81   | 1.09   | 0.79   | 1.05    | 0.85   | 0.82   | 1.11    | 1.68** |
| gen_gwas_endocrine_eyes (151)       | 2.37**  | 1.94   | 0.78   | 1.19   | 0.97*  | 1.79*  | 2.95*  | 1.1    | 1.07   | 0.57   | 0      | 0     | 0.34** | 0.98   | 0.29** | 1.48   | 1.06   | 0.67*  | 0.67   | 1.01   | 2.70** | 0.89   | 1.04   | 1.15   | 4.20**  | 0.44*  | 0.56   | 1.91*   | 1.64** |
| gen_gwas_eye_no (903)               | 1.84**  | 1.13   | 0.71** | 1.21*  | 0.64** | 1.29*  | 2.08   | 1.09   | 0.84   | 1.34   | 0.97   | 0.48  | 0.87   | 0.42   | 0.38   | 0.79   | 1.69** | 1.04   | 0.88   | 1.06   | 1.48** | 0.98   | 1.14   | 0.98   | 0.99    | 0.96   | 0.79   | 0.67    | 1.94*  |
| gen_gwas_eye_eyes (89)              | 0.63**  | 2.01*  | 0.24** | 1.02   | 0.8    | 1.31   | 4.65** | 1.05   | 1.43   | 1.28   | 1.05   | 2.42  | 1.43   | 3.46** | 0.96   | 1.51   | 1.31   | 0.87   | 1.1    | 0.86   | 1.12   | 0.81   | 1.71*  | 0.82   | 0.44    | 0.62   | 1.28   | 1.82    | 1.34   |
| gen_gwas_gi_no (860)                | 2.16**  | 0.98   | 0.8    | 1.27*  | 0.51** | 1.73** | 0.77   | 1.05   | 0.67*  | 0.92   | 1.05   | 0.67  | 1.1    | 0.42** | 0.71*  | 1.77** | 0.91   | 0.53** | 0.8    | 1.69** | 1.06   | 0.74*  | 1.25*  | 0.66   | 2.62**  | 0.57** | 0.66** | 1.4*    | 1.79** |
| gen_gwas_gi_eyes (132)              | 1.83**  | 2.64** | 0.16** | 0.86   | 0.84   | 1.21   | 4.68** | 1.18   | 2.28** | 0.69   | 0.76   | 0.85  | 0.81   | 2.67** | 1.15   | 1.22   | 1.89   | 1.34   | 1.27   | 0.48** | 0.78   | 0.97   | 0.61*  | 1.85   | 0.38    | 1.81*  | 1.92** | 1.03    | 1.43   |
| gen_gwas_heart_no (823)             | 1.36**  | 1.37** | 0.58** | 1.17   | 0.84   | 1.56** | 1.04   | 1.13   | 0.76   | 0.86   | 1.06   | 0.55  | 1.21   | 0.72   | 0.86   | 1.69** | 1.22   | 0.72** | 0.86   | 1.27*  | 1.04   | 0.71** | 0.96   | 0.94   | 1.25    | 0.7*   | 0.82   | 1.53**  | 1.94** |
| gen_gwas_heart_eyes (169)           | 6.29**  | 0.96   | 1.02   | 1.12   | 0.21** | 1.58*  | 2.59*  | 0.92   | 1.56   | 0.93   | 0.79   | 1.4   | 0.6    | 0.69   | 0.5    | 1.19   | 0.78   | 0.45** | 1.02   | 1.38   | 0.87   | 1.07   | 1.5*   | 0.65   | 2.98**  | 0.98   | 0.59   | 0.77    | 1.08   |
| gen_gwas_hepatobiliary_no (924)     | 2.10**  | 1.08   | 0.71*  | 1.31*  | 0.66** | 1.68** | 1.76   | 1.13   | 0.9    | 0.82   | 1.04   | 0.58  | 0.67   | 0.71   | 1.72*  | 1.65** | 1.19   | 0.59** | 0.62   | 1.34*  | 0.91   | 0.72** | 1.04   | 0.85   | 2.03**  | 0.72*  | 0.71*  | 1.4*    | 2.09** |
| gen_gwas_hepatobiliary_eyes (903)   | 0.54**  | 0.57** | 0.29** | 0.83   | 0.54** | 0.97   | 1.74   | 0.67   | 0.8    | 1.18   | 0.62   | 0.71  | 0.87   | 0.42   | 0.38   | 0.79   | 1.69** | 1.04   | 0.88   | 1.06   | 1.48** | 0.98   | 1.14   | 0.98   | 0.99    | 0.96   | 0.79   | 0.67    | 1.94*  |
| gen_gwas_immune_no (720)            | 2.04**  | 0.93   | 1.03   | 1.14   | 0.56** | 1.65** | 0.86   | 0.93   | 0.63*  | 1.14   | 1.15   | 0.69  | 1      | 0.41** | 0.51** | 0.99*  | 0.91   | 0.41** | 0.69*  | 1.62** | 1.02   | 0.66** | 1.2    | 0.91   | 2.37**  | 0.57** | 0.49** | 1.25    | 2.23** |
| gen_gwas_immune_eyes (272)          | 1.97**  | 1.86** | 0.18** | 1.14   | 0.99   | 1.28   | 2.6*   | 1.35*  | 1.71** | 0.47*  | 0.72   | 0.81  | 1.08   | 1.74*  | 1.69** | 0.81   | 1.45   | 1.61** | 1.42   | 0.9    | 0.95   | 1.16   | 0.86   | 0.81   | 0.66    | 1.33   | 1.64** | 1.25    | 0.8    |
| gen_gwas_infection_no (935)         | 2.54**  | 1.37** | 0.82** | 1.13   | 0.59** | 1.77** | 1.71   | 1.12   | 0.87   | 0.83   | 0.96   | 0.73  | 1.15   | 0.69   | 0.77*  | 2.0**  | 1.16   | 0.55** | 0.71*  | 1.3*   | 1.1    | 0.72** | 1.05   | 0.83   | 2.03**  | 0.75*  | 0.71*  | 1.4*    | 2.05** |
| gen_gwas_infection_eyes (57)        | 1.22    | 0.68   | 0.68   | 1.82*  | 0.89   | 1.23   | 0.81   | 0.86   | 1.27   | 1.12   | 1.25   | 0     | 0.3*   | 0.51   | 0.74   | 0.37   | 0.79   | 1.49   | 3.02** | 1.92*  | 0.32** | 1.17   | 1.47   | 1      | 1.54    | 0.55   | 1.03   | 1.11    | 0.85   |
| gen_gwas_mental_no (744)            | 1.56**  | 1.37** | 0.48** | 1.28*  | 0.95   | 1.11   | 1.53   | 1.28*  | 1.24   | 1.04   | 1.15   | 0.87  | 1.4*   | 0.75   | 0.87   | 1.74** | 1.61*  | 0.77*  | 0.96   | 0.66** | 1.28*  | 0.83   | 0.81*  | 0.75   | 1.84**  | 0.93   | 0.96   | 1.48*   | 1.69** |
| gen_gwas_mental_eyes (278)          | 2.79**  | 0.92   | 1.37   | 0.94   | 0.25** | 2.91** | 1.18   | 0.74   | 0.42** | 0.59   | 0.7    | 0.42  | 0.47** | 0.7*   | 0.68   | 1.08   | 1.78   | 0.48** | 0.78   | 3.63** | 0.37** | 0.74   | 1.63** | 1.18   | 1.31    | 0.47** | 0.44*  | 0.9     | 1.39*  |
| gen_gwas_metabolism_no (674)        | 2.10**  | 0.96   | 0.15** | 1.21*  | 0.65** | 1.62** | 1.12   | 1.05   | 0.76   | 0.83   | 1      | 0.53  | 1.28   | 0.6*   | 0.58** | 0.23** | 0.96   | 0.52** | 0.81   | 1.35*  | 1.17   | 0.68** | 1.03   | 1.04   | 1.48*   | 0.59** | 0.66** | 1.25    | 2.45** |
| gen_gwas_metabolism_eyes (318)      | 1.48**  | 2.1**  | 1.12   | 0.55** | 0.88   | 1.31*  | 3.04** | 1.09   | 0.82   | 0.81   | 1.18   | 0.31  | 2.03** | 1.42   | 0.54** | 2.28** | 1.09   | 0.87   | 0.76   | 0.62** | 2.7**  | 0.74   | 0.83   | 0.87   | 1.51    | 0.67   | 0.7    | 1.25    | 2.15** |
| gen_gwas_musculoskeletal_no (833)   | 2.16**  | 1.07   | 0.67*  | 1.32*  | 0.51** | 1.74** | 1.55   | 1.05   | 0.99   | 0.98   | 1.12   | 0.54  | 0.68*  | 0.7    | 0.81   | 2.01** | 0.92   | 0.53** | 0.8    | 1.60** | 0.79*  | 0.79*  | 1.36** | 0.92   | 1.18    | 0.74   | 0.82   | 1.16    | 2.21** |
| gen_gwas_musculoskeletal_eyes (159) | 1.64*   | 1.77** | 0.65   | 0.78   | 1.39   | 1.15   | 1.2    | 1.11   | 0.72   | 0.56   | 0.61   | 1.5   | 2.78** | 0.74   | 0.74   | 0.68   | 1.71   | 1.21   | 0.85   | 0.59*  | 2.3**  | 0.89   | 0.48** | 0.69   | 3.4**   | 0.81   | 0.58   | 1.68*   | 0.71   |
| gen_gwas_neoplasm_no (835)          | 1.54**  | 1.02   | 0.77*  | 1.24*  | 0.65** | 1.62** | 1.12   | 1.05   | 0.76   | 0.83   | 1      | 0.53  | 1.28   | 0.6*   | 0.58** | 0.23** | 0.96   | 0.52** | 0.81   | 1.35*  | 1.17   | 0.68** | 1.03   | 1.04   | 1.48*   | 0.59** | 0.66** | 1.25    | 2.45** |
| gen_gwas_neoplasm_eyes (157)        | 4.7**   | 2.04** | 0.32** | 0.95   | 0.37   | 1.43   | 2.38   | 1.14   | 1.62   | 1.01   | 0.95   | 1.52  | 0.48** | 1.2    | 1.88   | 0.34** | 1.55   | 1.28   | 1.2    | 1.18   | 0.66** | 1.34   | 1.24   | 3.24** | 1.52    | 1.23   | 1.42   | 0.47**  |        |
| gen_gwas_nervous_no (756)           | 1.31**  | 1.1    | 0.8    | 1.12   | 0.61** | 1.45** | 0.98   | 1.05   | 0.84   | 1.01   | 1.11   | 0.47  | 1.24   | 0.47** | 0.65** | 1.44*  | 0.67   | 0.57** | 0.79   | 1.51** | 1.3*   | 0.58** | 0.92   | 0.54   | 2.00**  | 0.57** | 0.61** | 0.75    | 1.57** |
| gen_gwas_nervous_eyes (236)         | 4.11**  | 1.48   | 0.97   | 1.21*  | 0.64** | 1.29*  | 1.92   | 1.13   | 0.82   | 0.74   | 1.21   | 0.85  | 0.82   | 0.52   | 0.52   | 0.38   | 1.17   | 0.28   | 0.38   | 1.17   | 0.28   | 0.38   | 1.47   | 0.75   | 2.01**  | 0.63** | 0.61** | 1.13    | 2.09** |
| gen_gwas_pregnancy_no (957)         | 0.27**  | 1.43** | 0.16** | 1.06   | 0.64** | 1.27*  | 1.82   | 1.08   | 0.86   | 0.91   | 1.01   | 0.7   | 1.08   | 0.47*  | 0.8    | 1.47** | 1.17   | 0.62** | 0.86   | 1.45** | 1.05   | 0.79*  | 1.11   | 0.9    | 2.37**  | 0.74*  | 0.71*  | 1.47*   | 1.77** |
| gen_gwas_pregnancy_eyes (35)        | 0.82    | 0.14** | 0.57** | 1.79** | 0.18** | 2.47*  | 0      | 1.26   | 2.3*   | 0      | 0.64   | 0     | 0.51   | 1.35   | 1.16   | 3.32** | 0.63   | 0.32*  | 0.58   | 0.84   | 0.43   | 0.56   | 0.93   | 0      | 0.37    | 0.44   | 0.95   | 0.56    | 3.91** |
| gen_gwas_repro_no (871)             | 1.9**   | 1.16   | 0.63** | 1.28*  | 0.6**  | 1.73** | 0.84   | 1.16   | 0.76   | 1      | 1.02   | 0.85  | 0.83   | 0.64*  | 0.78   | 2.35** | 1.21   | 0.54** | 0.85   | 1.51** | 0.87   | 0.74*  | 1.31*  | 0.74   | 0.86    | 0.72*  | 0.67** | 1.63*   | 2.21** |
| gen_gwas_repro_eyes (121)           | 3.86**  | 1.55*  | 0.77   | 0.8    | 0.91   | 1.22   | 4.46** | 0.78   | 1.75*  | 0.36   | 0.84   | 0     | 0.12** | 1.01   | 0.82   | 0.16** | 0.73   | 1.22   | 1.07   | 0.79   | 1.6*   | 0.45** | 1.46   | 7.13** | 0.88    | 1.22   | 0.47   | 0.65    |        |
| gen_gwas_respiratory_no (932)       | 2.12**  | 1.08   | 0.61** | 1.4**  | 0.58** | 1.78** | 1.72   | 1.12   | 0.8    | 0.8    | 1.02   | 0.57  | 1.1    | 0.62*  | 0.68** | 1.85** | 0.81   | 0.52** | 0.77   | 1.47** | 1.06   | 0.79*  | 1.14   | 0.84   | 2.21**  | 0.59** | 0.6**  | 1.34    | 2.16** |
| gen_gwas_respiratory_eyes (60)      | 4.41**  | 0.79** | 0.83   | 0.23** | 1.11   | 1.28   | 0.77   | 0.87   | 2.0*   | 1.36   | 0.75   | 1.97  | 0.81   | 1.31   | 1.18   | 0.89   | 4.19** | 1.98*  | 2      | 0.81   | 0.59   | 0.57   | 0.81   | 0.84   | 0.92    | 2.55*  | 2.57** | 1.47    | 0.54   |
| gen_gwas_skin_no (933)              | 2.10**  | 1.25   | 0.16** | 1.16   | 0.37** | 1.79** | 0.67   | 1.07   | 0.88   | 1.01   | 0.97   | 0.57  | 1.06   | 0.62*  | 0.69** | 1.92** | 0.89   | 0.62** | 0.73   | 1.07   | 1.37   | 0.73   | 0.73   | 2.01** | 0.63**  | 0.61** | 1.13   | 2.09**  |        |
| gen_gwas_skin_eyes (59)             | 0.98    | 1.48   | 0.39** | 1.24   | 0.28   | 1.16   | 2.24   | 1.34   | 1.33   | 1.81   | 1.21   | 0.41  | 0.85   | 0.82   | 0.52   | 0.37   | 1.11   | 2.37** | 0.95   | 0.29** | 0.37*  | 0.35   | 0.47*  | 0.73   | 1.81    | 0.68   | 0.38   | 0.38    | 1.94** |
| gen_gwas_urologic_no (878)          | 2.07**  | 1.36** | 0.44** | 1.12   | 0.61** | 1.78** | 1.82   | 1.03   | 0.71** | 0.91   | 1.01   | 0.7   | 1.1    | 0.63*  | 0.66** | 1.87** | 1.17   | 0.62** | 0.88   | 1.39** | 1.02   | 0.71** | 1.18   | 0.7    | 2.24**  | 0.74*  | 0.68** | 1.1     | 2.02** |
| gen_gwas_urologic_eyes (35)         | 0.82    | 0.58   | 0.25*  | 0.70** | 0.62   | 1.35   | 0      | 2.06*  | 0.54   | 0      | 0.64   | 0     | 0.33   | 1.35   | 0.65** | 0.19   | 0.63   | 0.32*  | 0.58   | 1.41   | 0.7    | 1.53   | 0.44   | 3.54   | 0.78    | 0.44   | 1.54   | 0.27    | 0.1*   |
| gen_gwas_vascular_no (756)          | 1.6**   | 1.39** | 0.68** | 1.02   | 0.72** | 1.47** | 0.62   | 1.07   | 0.82   | 0.9    | 0.94   | 0.32  | 1.06   | 0.59** | 0.83   | 1.09   | 1.1    | 0.74** | 0.88   | 1.35*  | 1      | 0.82   | 1.01   | 0.63   | 1.91**  | 0.65** | 0.67** | 1.18    | 1.18   |
| gen_gwas_vascular_eyes (236)        | 0.71**  | 0.88   | 0.7    | 1.49** | 0.68** | 1.63** | 3.93** | 1.07   | 1.19   | 0.85   | 1.1    | 2.26  | 0.92   | 1.13   | 0.76   | 2.44** | 1.07   | 0.52** | 0.94   | 1.14   | 0.8    | 0.78   | 1.21   | 1.56   | 1.23    | 1.13   | 1.09   | 1.44    | 2.66** |
| gen_omim_blood_no (884)             | 1.9**   | 0.79*  | 1.75** | 0.87   | 0.95** | 1.55** | 0.9    | 0.84   | 1.29   | 0.29** | 0.91   | 2.34  | 1.56** | 0.81   | 0.68** | 1      | 0.73   | 0.96** | 0.76   | 2.05** | 1.77** | 1.19   | 1.34** | 1.56   | 2.57**  | 1.09   | 0.79   | 1.29    | 0.97   |
| gen_omim_blood_eyes (251)           | 1.94**  | 2.55** | 0.99   | 0.41** | 2.12** | 0.74*  | 1.14   | 1.64** | 0.75   | 0.79** | 2.29** | 0.41  | 0.41** | 0.82   | 0.84*  |        |        |        |        |        |        |        |        |        |         |        |        |         |        |

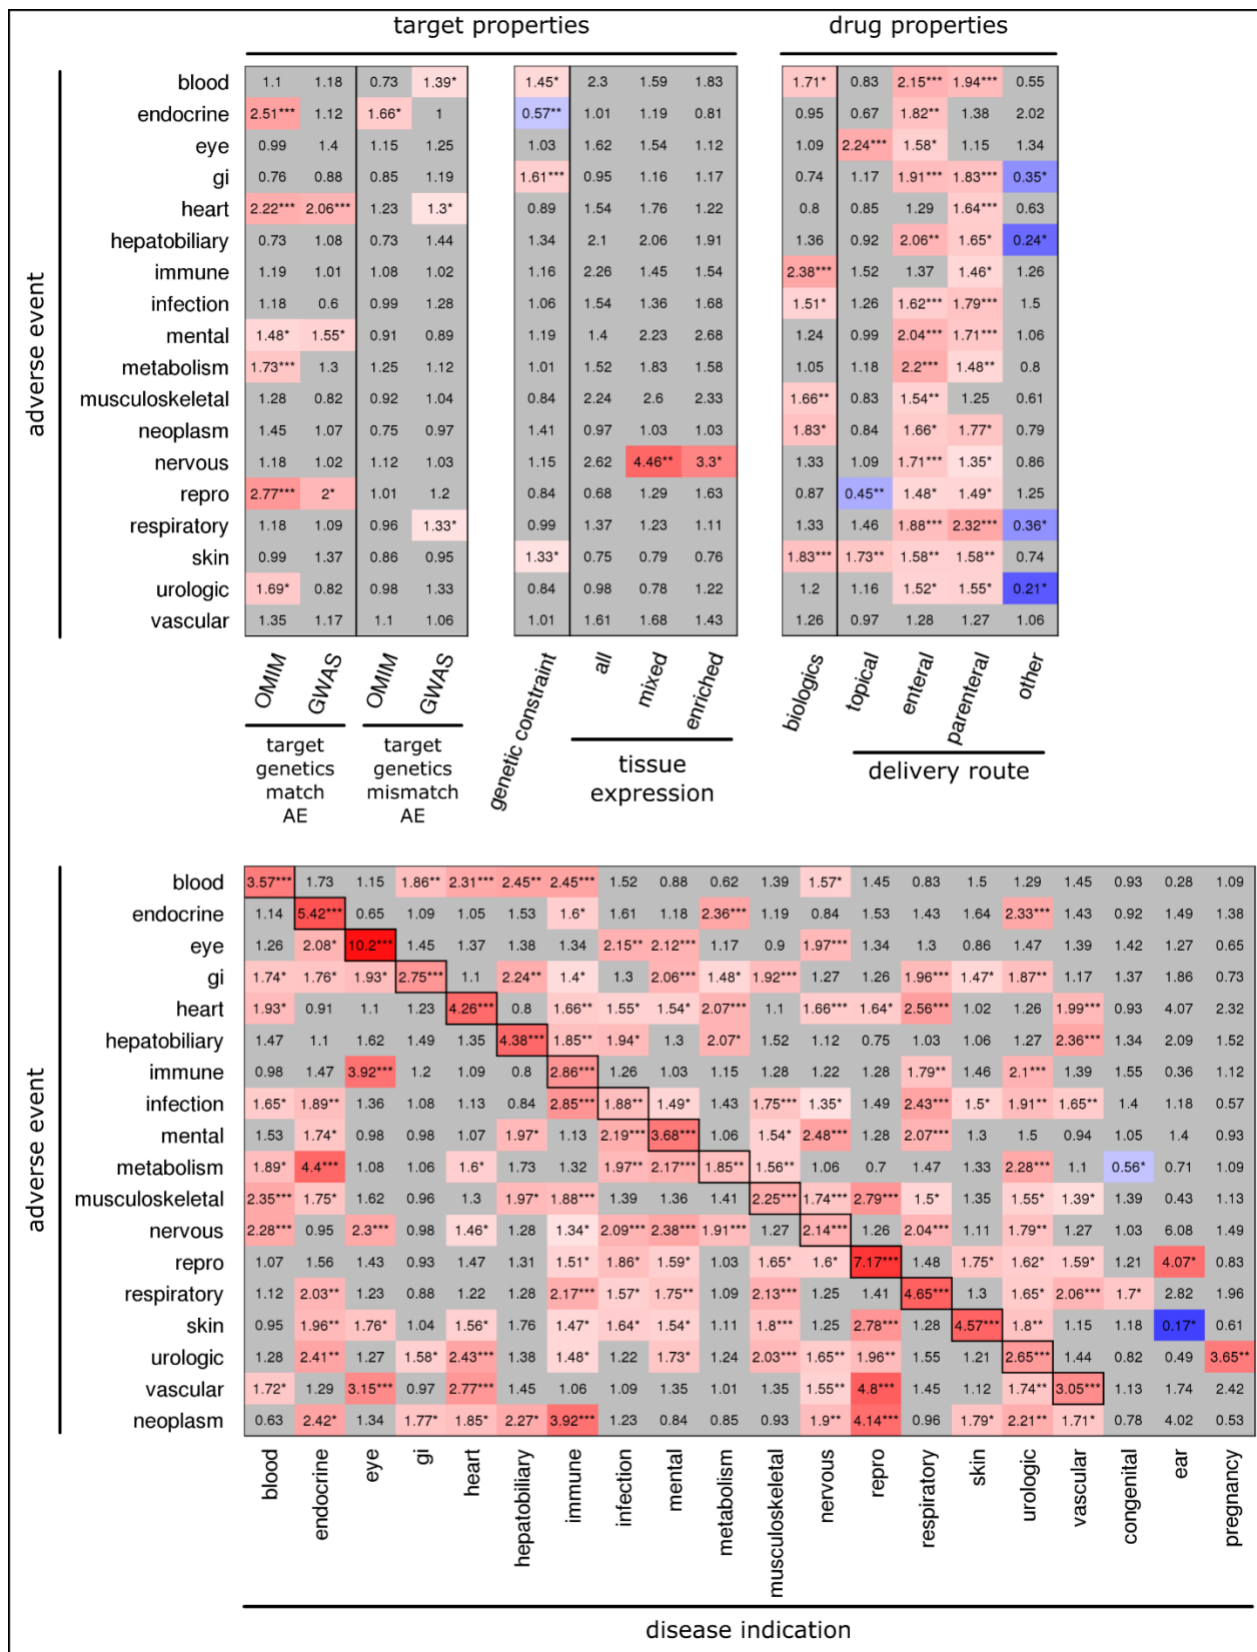

**Supplementary Figure 2.** All coefficients from each of the 18 side effect regression models, where “on-indication” side effects are retained in the data. Asterisks show P-value of the coefficient (\*,  $P < 0.05$ ; \*\*,  $P < 0.005$ ; \*\*\*,  $P < 0.0005$ ).

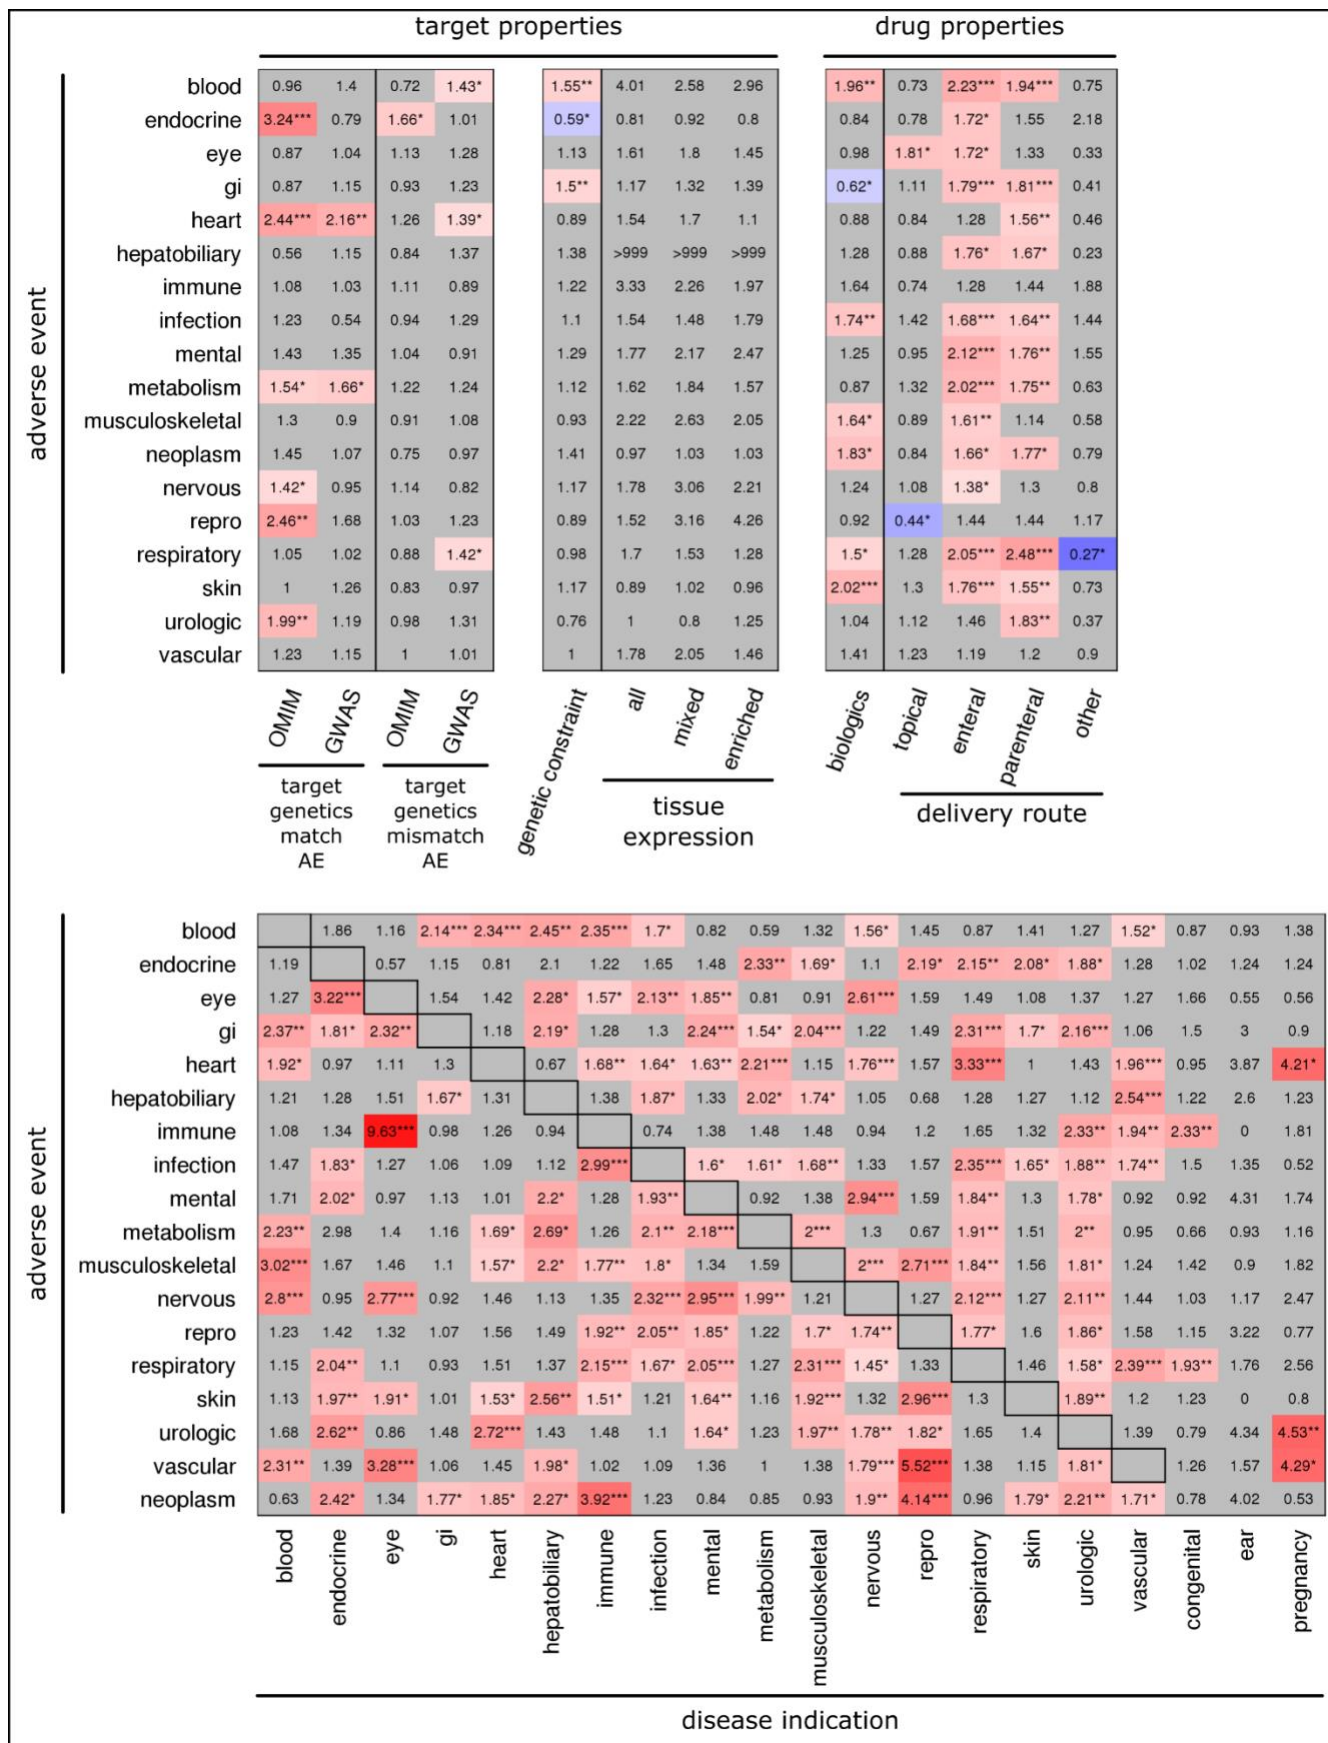

**Supplementary Figure 3.** All coefficients from each of the 18 side effect regression models, where only “off-indication” side effects are retained in the data. Asterisks show P-value of the coefficient (\*,  $P < 0.05$ ; \*\*,  $P < 0.005$ ; \*\*\*,  $P < 0.0005$ ).



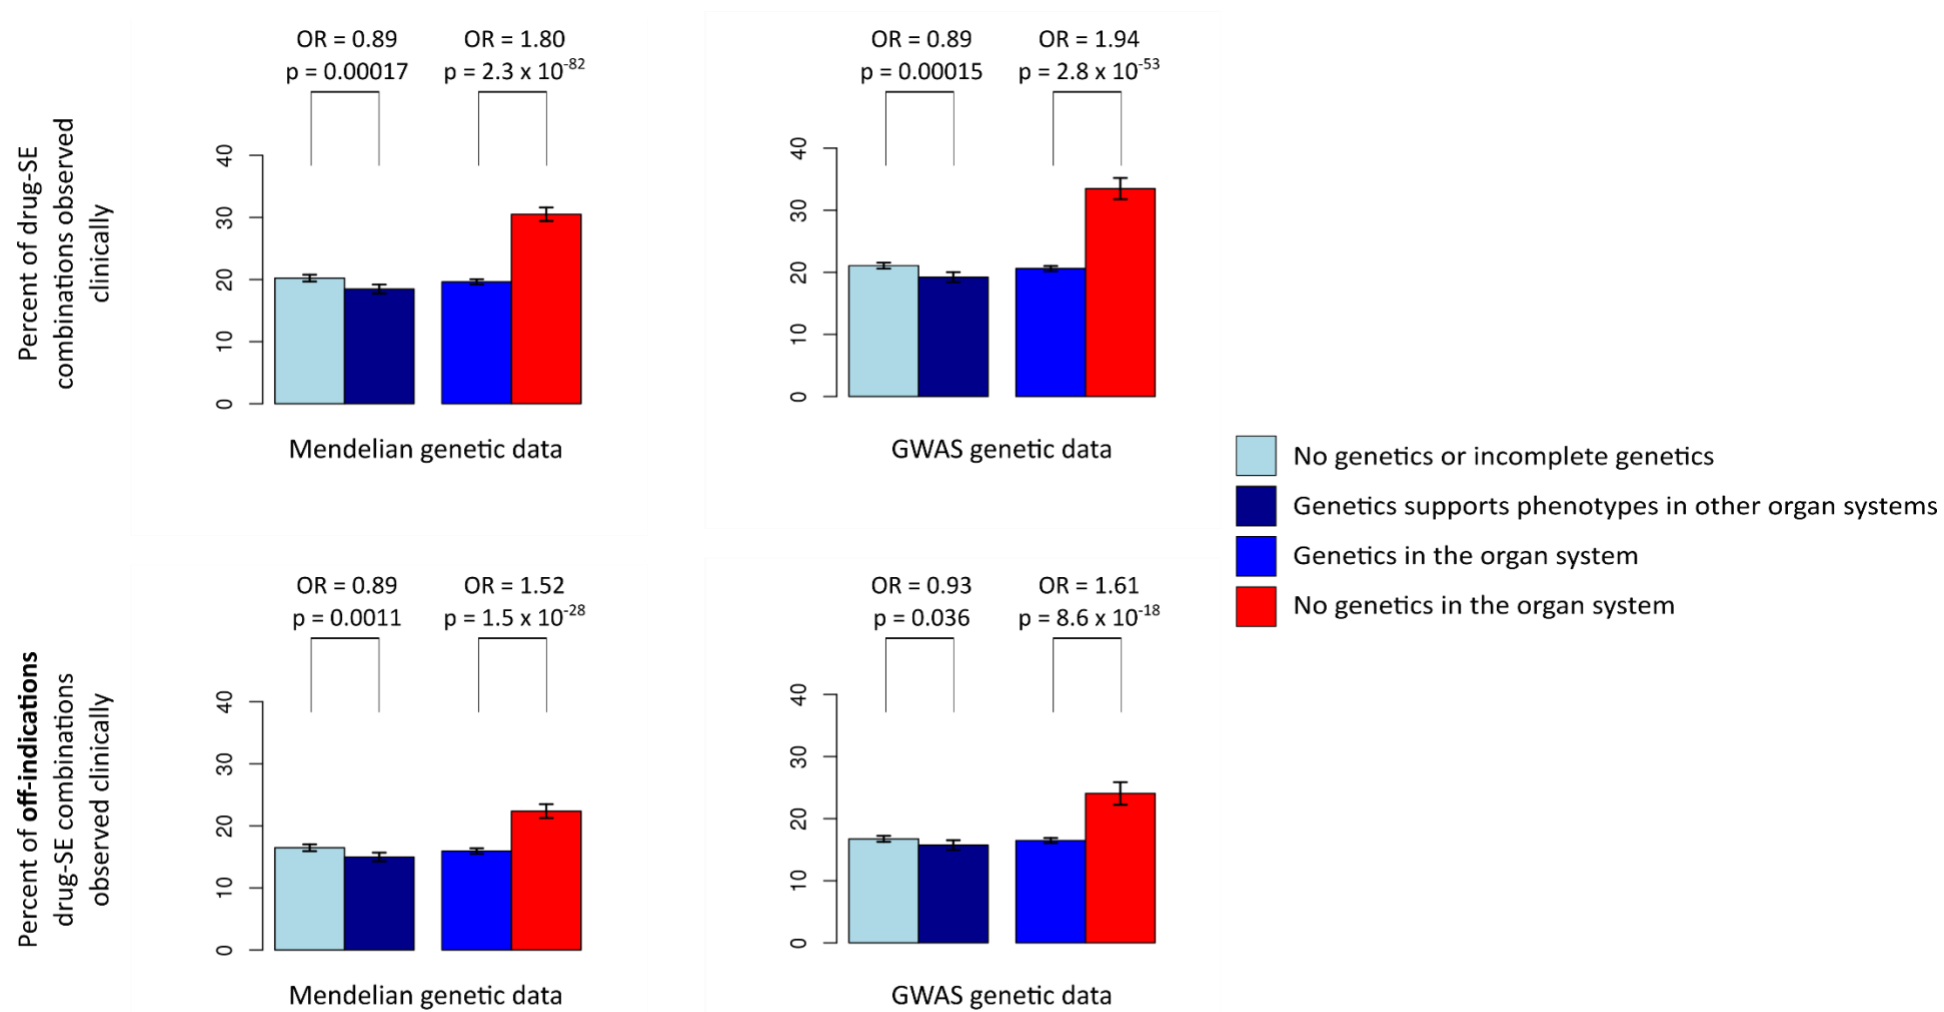

**Supplementary Figure 4.** Comparison of the rate at which all possible drug-SE (side effect) combinations are manifested as side effects in the clinical trial data set, between drug-SE pairs with or without genetic support. OR, odds ratio; P, P-value from Fisher's exact test (two-tailed). The top two panels show analyses based on all 38,199 drug-SE combinations; the bottom two panels show analyses based on 33,489 "off-indication" drug-SE combinations. The left two panels show analyses based on Mendelian genetic data; the right two panels show analyses based on GWAS genetic data. Error bars represent the 95% confidence interval of the reported proportions. Underlying data and confidence intervals for the OR values are shown in **Supplementary Table 1**.

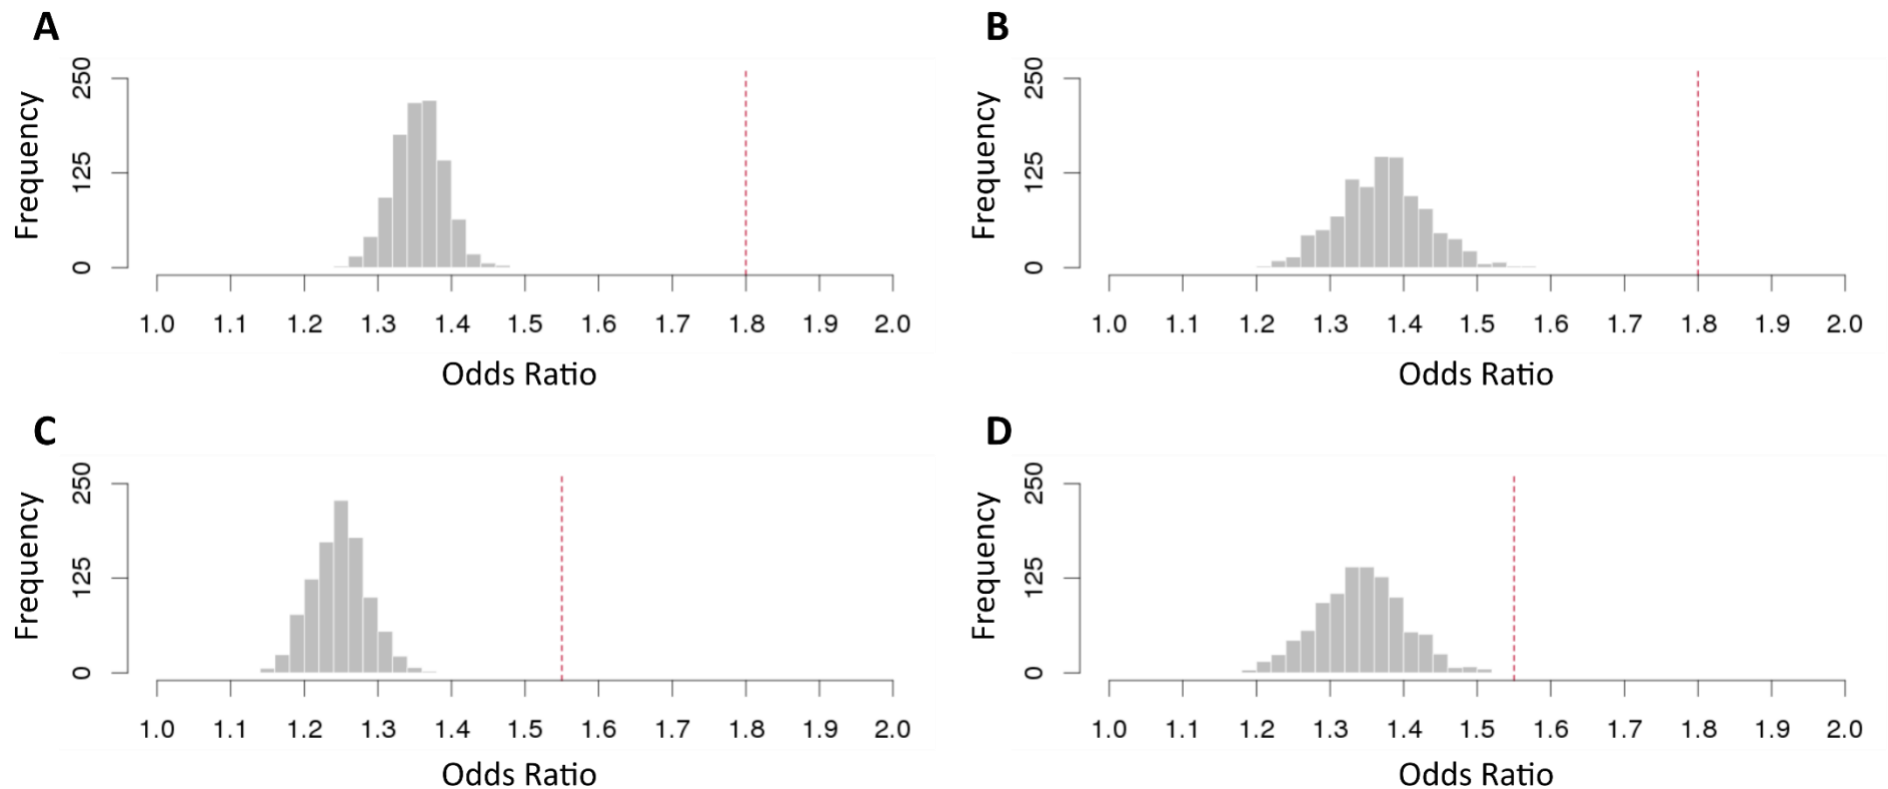

**Supplementary Figure 5.** Result of permutation test for significance of genetics-SE enrichment relative to randomized SEs and randomized target genetics. In each analysis, gray histogram shows ORs resulting from 1,000 simulations and dashed vertical line shows the OR of the study data. Mean and standard deviation of the simulation ORs are provided in **Supplementary Table 2**. In each analysis, the simulation OR never exceeds the study data OR (Monte Carlo empirical  $P < 0.001$ ). Analyses used: (A) all drug-SE pairs, randomized SEs; (B) all drug-SE pairs, randomized target genetics; (C) only off-indication drug-SE pairs, randomized SEs; (D) only off-indication drug-SE pairs, randomized target genetics.

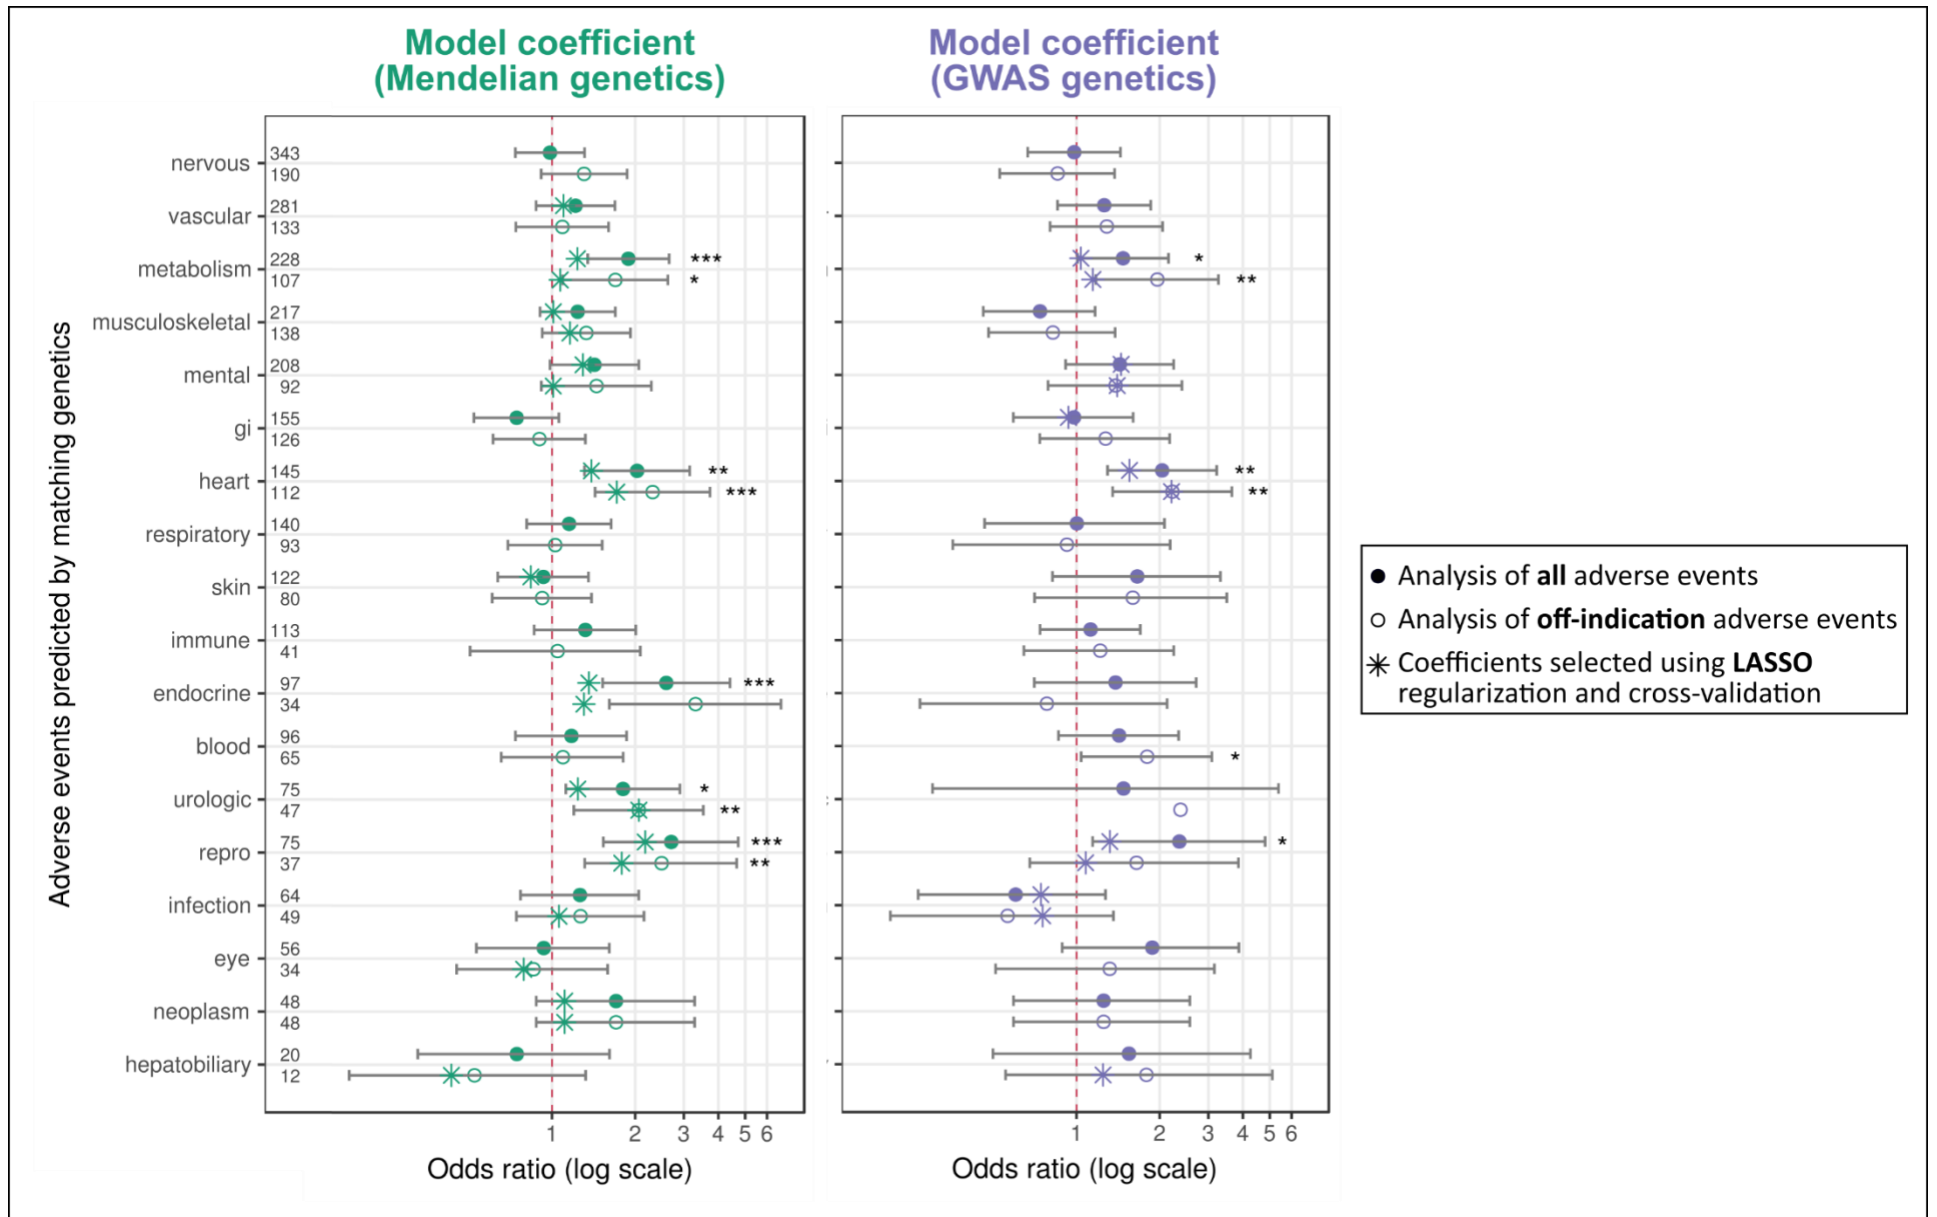

**Supplementary Figure 6.** Summary of side effect modeling results with quantitative, tissue-specific target gene expression values included in the models. LEFT: coefficients of the Mendelian genetics predictors in each of the 18 side effect models (from **Supplementary Table 9**). RIGHT: coefficients of the GWAS genetics predictors in each of the 18 side effect models (from **Supplementary Table 9**). Coefficients from the regression models were exponentiated to obtain odds ratios. Along each row, circular points indicate odds ratios from the glm models; error bars are 95% confidence intervals from the glm models; large eight-pointed stars indicate odds ratios when the genetics predictors are selected as predictors in the glmnet models (which are built using feature selection, lasso regularization, and cross-validation). Small asterisks offset from the data indicate P-values of the the Fisher's exact test (LEFT) and P-values of the coefficients from the glm models (CENTER and RIGHT); (\*,  $P < 0.05$ ; \*\*,  $P < 0.01$ ; \*\*\*,  $P < 0.001$ ).

| Data inclusion                                          | Comparison                                                                 | GS   | GN    | GS+GN | NS   | NN    | NS+NN | GS/GN | NS/NN | Odds Ratio | p        | OR 95% CI | GS/GS+GN | NS/NS+NN | stderr(GS/GS+GN) | stderr(NS/NS+NN) |
|---------------------------------------------------------|----------------------------------------------------------------------------|------|-------|-------|------|-------|-------|-------|-------|------------|----------|-----------|----------|----------|------------------|------------------|
| All drug-SE combinations, all genetics                  | Overall: Genetic support vs no genetic support                             | 2512 | 5862  | 8374  | 5729 | 24096 | 29825 | 0.43  | 0.24  | 1.80       | 1.73E-94 | 1.71 1.90 | 30.00%   | 19.21%   | 0.50%            | 0.23%            |
|                                                         | Among no genetic support: incomplete genetic info vs complete genetic info | 2759 | 12165 | 14924 | 2970 | 11931 | 14901 | 0.23  | 0.25  | 0.91       | 0.00158  | 0.86 0.97 | 18.49%   | 19.93%   | 0.32%            | 0.33%            |
| All drug-SE combinations, Mendelian genetics            | Overall: Genetic support vs no genetic support                             | 2092 | 4765  | 6857  | 6149 | 25193 | 31342 | 0.44  | 0.24  | 1.80       | 2.28E-82 | 1.70 1.91 | 30.51%   | 19.62%   | 0.56%            | 0.22%            |
|                                                         | Among no genetic support: incomplete genetic info vs complete genetic info | 2014 | 8893  | 10907 | 4135 | 16300 | 20435 | 0.23  | 0.25  | 0.89       | 0.00017  | 0.84 0.95 | 18.47%   | 20.23%   | 0.37%            | 0.28%            |
| All drug-SE combinations, GWAS genetics                 | Overall: Genetic support vs no genetic support                             | 962  | 1911  | 2873  | 7279 | 28047 | 35326 | 0.50  | 0.26  | 1.94       | 2.75E-53 | 1.79 2.11 | 33.48%   | 20.61%   | 0.88%            | 0.22%            |
|                                                         | Among no genetic support: incomplete genetic info vs complete genetic info | 1745 | 7334  | 9079  | 5534 | 20713 | 26247 | 0.24  | 0.27  | 0.89       | 0.00015  | 0.84 0.95 | 19.22%   | 21.08%   | 0.41%            | 0.25%            |
| Off-indication drug-SE combinations, all genetics       | Overall: Genetic support vs no genetic support                             | 1458 | 5062  | 6520  | 4219 | 22750 | 26969 | 0.29  | 0.19  | 1.55       | 1.70E-36 | 1.45 1.66 | 22.36%   | 15.64%   | 0.52%            | 0.22%            |
|                                                         | Among no genetic support: incomplete genetic info vs complete genetic info | 2067 | 11595 | 13662 | 2152 | 11155 | 13307 | 0.18  | 0.19  | 0.92       | 0.01892  | 0.86 0.99 | 15.13%   | 16.17%   | 0.31%            | 0.32%            |
| Off-indication drug-SE combinations, Mendelian genetics | Overall: Genetic support vs no genetic support                             | 1180 | 4095  | 5275  | 4497 | 23717 | 28214 | 0.29  | 0.19  | 1.52       | 1.47E-28 | 1.41 1.63 | 22.37%   | 15.94%   | 0.57%            | 0.22%            |
|                                                         | Among no genetic support: incomplete genetic info vs complete genetic info | 1503 | 8528  | 10031 | 2994 | 15189 | 18183 | 0.18  | 0.20  | 0.89       | 0.00111  | 0.84 0.96 | 14.98%   | 16.47%   | 0.36%            | 0.28%            |
| Off-indication drug-SE combinations, GWAS genetics      | Overall: Genetic support vs no genetic support                             | 506  | 1597  | 2103  | 5171 | 26215 | 31386 | 0.32  | 0.20  | 1.61       | 8.61E-18 | 1.44 1.78 | 24.06%   | 16.48%   | 0.93%            | 0.21%            |
|                                                         | Among no genetic support: incomplete genetic info vs complete genetic info | 1292 | 6919  | 8211  | 3879 | 19296 | 23175 | 0.19  | 0.20  | 0.93       | 0.0362   | 0.87 1.00 | 15.73%   | 16.74%   | 0.40%            | 0.25%            |

**Supplementary Table 1.** Comparison of the rate at which all possible drug-SE (side effect) combinations are manifested as side effects in the clinical trial data set, between drug-SE pairs with or without genetic support. OR, odds ratio; p, p-value from Fisher's exact test (two-tailed). GS = genetics + side effect; GN = genetics + no side effect; NS = no genetics + side effect; NN = no genetics + no side effect. For the overall comparison, "genetics" indicates a match between the side effect and genetic phenotype. For the "among no genetic support" comparison, "genetics" indicates that there is a genetic phenotype for the targets that mismatches; "no genetics" indicates there is no or incomplete genetic information for the target gene(s).



| Phenotype category                                                      | Main analysis                      |                                     |                                        |                                        |                                           |                                                                       |                                                                   |              |              |              |             |             |             |             | Off-indication analysis |                                    |                                     |                                        |                                        |                                           |                                                                       |                                                                   |              |              |              |              |             |             |             |             |             |                 |
|-------------------------------------------------------------------------|------------------------------------|-------------------------------------|----------------------------------------|----------------------------------------|-------------------------------------------|-----------------------------------------------------------------------|-------------------------------------------------------------------|--------------|--------------|--------------|-------------|-------------|-------------|-------------|-------------------------|------------------------------------|-------------------------------------|----------------------------------------|----------------------------------------|-------------------------------------------|-----------------------------------------------------------------------|-------------------------------------------------------------------|--------------|--------------|--------------|--------------|-------------|-------------|-------------|-------------|-------------|-----------------|
|                                                                         | (Drug x organ system) combinations | Drugs with genetics and side effect | Drugs with genetics and no side effect | Drugs with no genetics and side effect | Drugs with no genetics and no side effect | Rate of side effect when genetic association exists (precision) (PPV) | Rate of side effect when genetic association does not exist (FOR) | TPR (recall) | TNR          | NPV          | LR+         | iLR-        | OR          | 95% CI      | p                       | (Drug x organ system) combinations | Drugs with genetics and side effect | Drugs with genetics and no side effect | Drugs with no genetics and side effect | Drugs with no genetics and no side effect | Rate of side effect when genetic association exists (precision) (PPV) | Rate of side effect when genetic association does not exist (FOR) | TPR (recall) | TNR          | NPV          | LR+          | iLR-        | OR          | 95% CI      | p           |             |                 |
| blood                                                                   | 96                                 | 269                                 | 234                                    | 1220                                   | 26.3%                                     | 16.1%                                                                 | 29.1%                                                             | 81.9%        | 83.9%        | 1.61         | 1.16        | 1.86        | 1.40        | 2.46        | 1.34E-05                | 65                                 | 234                                 | 212                                    | 1193                                   | 21.7%                                     | 15.1%                                                                 | 23.5%                                                             | 83.6%        | 84.9%        | 1.43         | 1.09         | 1.56        | 1.13        | 2.15        | 0.005724    |             |                 |
| heart                                                                   | 145                                | 176                                 | 451                                    | 1047                                   | 45.2%                                     | 30.1%                                                                 | 24.3%                                                             | 85.6%        | 69.9%        | 1.69         | 1.13        | 1.91        | 1.48        | 2.46        | 3.92E-07                | 112                                | 162                                 | 318                                    | 992                                    | 40.9%                                     | 24.3%                                                                 | 26.0%                                                             | 86.0%        | 75.7%        | 1.86         | 1.16         | 2.16        | 1.63        | 2.85        | 5.90E-08    |             |                 |
| congenital                                                              | 17                                 | 572                                 | 22                                     | 1208                                   | 2.9%                                      | 1.8%                                                                  | 43.6%                                                             | 67.9%        | 98.2%        | 1.36         | 1.20        | 1.63        | 0.81        | 3.25        | 0.165102913             | 9                                  | 507                                 | 11                                     | 1135                                   | 1.7%                                      | 1.0%                                                                  | 45.0%                                                             | 69.1%        | 99.0%        | 1.46         | 1.26         | 1.83        | 0.67        | 4.89        | 0.222399    |             |                 |
| ear                                                                     | 5                                  | 112                                 | 74                                     | 1628                                   | 4.3%                                      | 4.3%                                                                  | 6.3%                                                              | 93.6%        | 95.7%        | 0.98         | 1.00        | 0.98        | 0.30        | 2.47        | 1                       | 4                                  | 112                                 | 65                                     | 1622                                   | 3.4%                                      | 3.9%                                                                  | 5.8%                                                              | 93.5%        | 96.1%        | 0.90         | 0.99         | 0.89        | 0.23        | 2.46        | 1           |             |                 |
| endocrine                                                               | 97                                 | 252                                 | 177                                    | 1293                                   | 27.8%                                     | 12.0%                                                                 | 35.4%                                                             | 83.7%        | 88.0%        | 2.17         | 1.30        | 2.81        | 2.09        | 3.76        | 3.71E-12                | 34                                 | 207                                 | 96                                     | 1204                                   | 14.1%                                     | 7.4%                                                                  | 26.2%                                                             | 85.3%        | 92.6%        | 1.78         | 1.16         | 2.06        | 1.31        | 3.17        | 0.001412    |             |                 |
| eye                                                                     | 56                                 | 256                                 | 193                                    | 1314                                   | 17.9%                                     | 12.8%                                                                 | 22.5%                                                             | 83.7%        | 87.2%        | 1.38         | 1.08        | 1.49        | 1.05        | 2.08        | 0.018630562             | 34                                 | 250                                 | 148                                    | 1268                                   | 12.0%                                     | 10.5%                                                                 | 18.7%                                                             | 83.5%        | 89.5%        | 1.13         | 1.03         | 1.17        | 0.76        | 1.75        | 0.4617      |             |                 |
| gl                                                                      | 155                                | 276                                 | 497                                    | 891                                    | 36.0%                                     | 35.8%                                                                 | 23.8%                                                             | 76.3%        | 64.2%        | 1.01         | 1.00        | 1.01        | 0.80        | 1.27        | 0.95420768              | 126                                | 244                                 | 379                                    | 823                                    | 34.1%                                     | 31.5%                                                                 | 25.0%                                                             | 77.1%        | 68.5%        | 1.09         | 1.03         | 1.12        | 0.87        | 1.44        | 0.373119    |             |                 |
| hepatobiliary                                                           | 20                                 | 153                                 | 160                                    | 1486                                   | 11.6%                                     | 9.7%                                                                  | 11.1%                                                             | 90.7%        | 90.3%        | 1.19         | 1.02        | 1.21        | 0.70        | 2.01        | 0.42299002              | 12                                 | 150                                 | 134                                    | 1443                                   | 7.4%                                      | 8.5%                                                                  | 8.2%                                                              | 90.6%        | 91.5%        | 0.87         | 0.99         | 0.86        | 0.42        | 1.60        | 0.766027    |             |                 |
| immune                                                                  | 113                                | 335                                 | 251                                    | 1120                                   | 25.2%                                     | 18.3%                                                                 | 31.0%                                                             | 77.0%        | 81.7%        | 1.35         | 1.12        | 1.51        | 1.16        | 1.95        | 0.001757385             | 41                                 | 232                                 | 116                                    | 914                                    | 15.0%                                     | 11.3%                                                                 | 26.1%                                                             | 79.8%        | 88.7%        | 1.29         | 1.08         | 1.39        | 0.92        | 2.07        | 0.09472     |             |                 |
| infection                                                               | 64                                 | 104                                 | 536                                    | 1115                                   | 38.1%                                     | 32.5%                                                                 | 10.7%                                                             | 91.5%        | 67.5%        | 1.25         | 1.02        | 1.28        | 0.91        | 1.80        | 0.143708732             | 49                                 | 89                                  | 455                                    | 1056                                   | 35.5%                                     | 30.1%                                                                 | 9.7%                                                              | 92.2%        | 69.9%        | 1.25         | 1.02         | 1.28        | 0.87        | 1.87        | 0.20933     |             |                 |
| metabolism                                                              | 228                                | 400                                 | 280                                    | 911                                    | 36.3%                                     | 23.5%                                                                 | 44.9%                                                             | 69.5%        | 76.5%        | 1.47         | 1.26        | 1.85        | 1.49        | 2.30        | 1.34E-08                | 107                                | 292                                 | 185                                    | 820                                    | 26.8%                                     | 18.4%                                                                 | 36.6%                                                             | 73.7%        | 81.6%        | 1.40         | 1.16         | 1.62        | 1.22        | 2.15        | 0.0006      |             |                 |
| musculoskeletal                                                         | 217                                | 435                                 | 322                                    | 845                                    | 33.3%                                     | 27.6%                                                                 | 40.3%                                                             | 66.0%        | 72.4%        | 1.18         | 1.11        | 1.31        | 1.06        | 1.62        | 0.01184709              | 138                                | 373                                 | 221                                    | 749                                    | 27.0%                                     | 22.8%                                                                 | 38.4%                                                             | 66.8%        | 77.2%        | 1.16         | 1.08         | 1.25        | 0.97        | 1.61        | 0.07435     |             |                 |
| neoplasm                                                                | 48                                 | 305                                 | 122                                    | 1344                                   | 13.6%                                     | 8.3%                                                                  | 28.2%                                                             | 81.5%        | 91.7%        | 1.53         | 1.14        | 1.73        | 1.19        | 2.50        | 0.003098258             | 48                                 | 305                                 | 122                                    | 1344                                   | 13.6%                                     | 8.3%                                                                  | 28.2%                                                             | 81.5%        | 91.7%        | 1.53         | 1.14         | 1.73        | 1.19        | 2.50        | 0.003098    |             |                 |
| nervous                                                                 | 343                                | 421                                 | 401                                    | 654                                    | 44.9%                                     | 38.0%                                                                 | 46.1%                                                             | 60.8%        | 62.0%        | 1.18         | 1.13        | 1.33        | 1.09        | 1.61        | 0.003732245             | 190                                | 312                                 | 266                                    | 558                                    | 37.8%                                     | 32.3%                                                                 | 41.7%                                                             | 64.1%        | 67.7%        | 1.16         | 1.10         | 1.28        | 1.01        | 1.62        | 0.042694    |             |                 |
| pregnancy                                                               | 7                                  | 268                                 | 35                                     | 1509                                   | 2.5%                                      | 2.3%                                                                  | 16.7%                                                             | 84.9%        | 97.7%        | 1.11         | 1.02        | 1.13        | 0.42        | 2.61        | 0.826676608             | 7                                  | 262                                 | 32                                     | 1486                                   | 2.6%                                      | 2.1%                                                                  | 17.9%                                                             | 85.0%        | 97.9%        | 1.20         | 1.04         | 1.24        | 0.46        | 2.90        | 0.648859    |             |                 |
| mental                                                                  | 208                                | 350                                 | 255                                    | 1006                                   | 37.3%                                     | 20.2%                                                                 | 44.9%                                                             | 74.2%        | 79.8%        | 1.74         | 1.35        | 2.34        | 1.87        | 2.94        | 5.16E-14                | 92                                 | 278                                 | 177                                    | 912                                    | 24.9%                                     | 16.3%                                                                 | 34.2%                                                             | 76.6%        | 83.7%        | 1.46         | 1.16         | 1.71        | 1.27        | 2.29        | 0.000342    |             |                 |
| urologic                                                                | 75                                 | 245                                 | 220                                    | 1279                                   | 23.4%                                     | 14.7%                                                                 | 25.4%                                                             | 83.9%        | 85.3%        | 1.58         | 1.13        | 1.78        | 1.30        | 2.41        | 0.000219979             | 47                                 | 215                                 | 162                                    | 1220                                   | 17.9%                                     | 11.7%                                                                 | 22.5%                                                             | 85.0%        | 88.3%        | 1.50         | 1.10         | 1.65        | 1.13        | 2.37        | 0.008259    |             |                 |
| repro                                                                   | 75                                 | 199                                 | 186                                    | 1359                                   | 27.4%                                     | 12.0%                                                                 | 28.7%                                                             | 87.2%        | 88.0%        | 2.25         | 1.22        | 2.75        | 2.00        | 3.77        | 5.75E-10                | 37                                 | 185                                 | 148                                    | 1318                                   | 16.7%                                     | 10.1%                                                                 | 20.0%                                                             | 87.7%        | 89.9%        | 1.62         | 1.10         | 1.78        | 1.17        | 2.66        | 0.005417    |             |                 |
| respiratory                                                             | 140                                | 211                                 | 464                                    | 1004                                   | 39.9%                                     | 31.6%                                                                 | 23.2%                                                             | 82.6%        | 68.4%        | 1.33         | 1.08        | 1.44        | 1.12        | 1.84        | 0.003676008             | 93                                 | 197                                 | 361                                    | 950                                    | 32.1%                                     | 27.5%                                                                 | 20.5%                                                             | 82.8%        | 72.5%        | 1.19         | 1.04         | 1.24        | 0.93        | 1.65        | 0.130584    |             |                 |
| skin                                                                    | 122                                | 224                                 | 413                                    | 1060                                   | 35.3%                                     | 28.0%                                                                 | 22.8%                                                             | 82.6%        | 72.0%        | 1.31         | 1.07        | 1.40        | 1.08        | 1.80        | 0.00874946              | 80                                 | 211                                 | 307                                    | 1004                                   | 27.5%                                     | 23.4%                                                                 | 20.7%                                                             | 82.6%        | 76.6%        | 1.19         | 1.04         | 1.24        | 0.92        | 1.66        | 0.150424    |             |                 |
| vascular                                                                | 281                                | 299                                 | 436                                    | 803                                    | 48.4%                                     | 35.2%                                                                 | 39.2%                                                             | 72.9%        | 64.8%        | 1.44         | 1.20        | 1.73        | 1.41        | 2.13        | 8.31E-08                | 133                                | 245                                 | 304                                    | 739                                    | 35.2%                                     | 29.1%                                                                 | 30.4%                                                             | 75.1%        | 70.9%        | 1.22         | 1.08         | 1.32        | 1.02        | 1.71        | 0.031836    |             |                 |
| <b>TOTAL</b>                                                            | <b>38199</b>                       | <b>2512</b>                         | <b>5862</b>                            | <b>5729</b>                            | <b>24096</b>                              | <b>30.0%</b>                                                          | <b>19.2%</b>                                                      | <b>30.5%</b> | <b>80.4%</b> | <b>80.8%</b> | <b>1.56</b> | <b>1.16</b> | <b>1.80</b> | <b>1.71</b> | <b>1.90</b>             | <b>1.73E-94</b>                    | <b>33489</b>                        | <b>1458</b>                            | <b>5062</b>                            | <b>4219</b>                               | <b>22750</b>                                                          | <b>22.4%</b>                                                      | <b>15.6%</b> | <b>25.7%</b> | <b>81.8%</b> | <b>84.4%</b> | <b>1.41</b> | <b>1.10</b> | <b>1.55</b> | <b>1.45</b> | <b>1.66</b> | <b>1.70E-36</b> |
| <b>Main analysis with randomized data categories</b>                    |                                    |                                     |                                        |                                        |                                           |                                                                       |                                                                   |              |              |              |             |             |             |             |                         |                                    |                                     |                                        |                                        |                                           |                                                                       |                                                                   |              |              |              |              |             |             |             |             |             |                 |
| Random genetics (mean of 1000 randomizations)                           | 38199                              | 2623                                | 7615                                   | 5618                                   | 22343                                     | 25.6%                                                                 | 20.1%                                                             | 31.8%        | 74.6%        | 79.9%        | 1.25        | 1.09        | 1.37        | 1.30        | 1.45                    | 1.99687E-11                        | 33489                               | 1762                                   | 6987                                   | 3915                                      | 20825                                                                 | 20.1%                                                             | 15.8%        | 31.0%        | 74.9%        | 84.2%        | 1.24        | 1.09        | 1.34        | 1.26        | 1.43        | 2.78E-09        |
| Standard deviation of random genetics                                   | 121                                | 334                                 | 121                                    | 334                                    | 0.58%                                     | 0.22%                                                                 | 1.46%                                                             | 1.12%        | 0.22%        | 0.04         | 0.02        | 0.06        | 0.06        | 0.06        | 6.11543E-10             | 85                                 | 317                                 | 85                                     | 317                                    | 0.5%                                      | 0.2%                                                                  | 1.5%                                                              | 1.1%         | 0.2%         | 0.04         | 0.01         | 0.06        | 0.06        | 0.06        | 6.41E-08    |             |                 |
| Random side effects (mean of 1000 randomizations)                       | 38199                              | 2528                                | 5846                                   | 7213                                   | 22612                                     | 30.2%                                                                 | 24.2%                                                             | 26.0%        | 79.5%        | 75.8%        | 1.26        | 1.07        | 1.36        | 1.28        | 1.43                    | 3.06273E-18                        | 33489                               | 1705                                   | 4815                                   | 5964                                      | 21005                                                                 | 26.2%                                                             | 22.1%        | 22.2%        | 81.4%        | 77.9%        | 1.19        | 1.05        | 1.25        | 1.17        | 1.33        | 2.53E-06        |
| Standard deviation of random side effects                               | 47                                 | 47                                  | 109                                    | 109                                    | 0.6%                                      | 0.4%                                                                  | 0.4%                                                              | 0.1%         | 0.37%        | 0.02         | 0.01        | 0.03        | 0.03        | 0.04        | 8.94689E-17             | 37                                 | 37                                  | 100                                    | 100                                    | 0.6%                                      | 0.4%                                                                  | 0.4%                                                              | 0.1%         | 0.4%         | 0.03         | 0.01         | 0.04        | 0.04        | 0.04        | 6.96E-05    |             |                 |
| <b>Main analysis using target annotations from single sources</b>       |                                    |                                     |                                        |                                        |                                           |                                                                       |                                                                   |              |              |              |             |             |             |             |                         |                                    |                                     |                                        |                                        |                                           |                                                                       |                                                                   |              |              |              |              |             |             |             |             |             |                 |
| DrugBank                                                                | 15981                              | 1402                                | 2123                                   | 3788                                   | 8668                                      | 39.8%                                                                 | 30.4%                                                             | 27.0%        | 80.3%        | 69.6%        | 1.37        | 1.10        | 1.51        | 1.40        | 1.63                    | 4.28442E-25                        | 13438                               | 755                                    | 1861                                   | 2694                                      | 8128                                                                  | 28.9%                                                             | 24.9%        | 21.9%        | 81.4%        | 75.1%        | 1.17        | 1.04        | 1.22        | 1.11        | 1.35        | 3.84E-05        |
| Citeline Pharmaprojects                                                 | 34944                              | 1923                                | 4480                                   | 5588                                   | 22953                                     | 30.0%                                                                 | 19.6%                                                             | 25.6%        | 83.7%        | 80.4%        | 1.57        | 1.12        | 1.76        | 1.66        | 1.87                    | 3.25909E-71                        | 30661                               | 1073                                   | 3797                                   | 4108                                      | 21683                                                                 | 22.0%                                                             | 15.9%        | 20.7%        | 85.1%        | 84.1%        | 1.39        | 1.07        | 1.49        | 1.38        | 1.61        | 3.83E-24        |
| Santos et al (2017)                                                     | 14133                              | 1395                                | 2012                                   | 3535                                   | 7191                                      | 40.9%                                                                 | 33.0%                                                             | 28.3%        | 78.1%        | 67.0%        | 1.29        | 1.09        | 1.41        | 1.30        | 1.53                    | 2.96E-17                           | 11770                               | 765                                    | 1791                                   | 2481                                      | 6733                                                                  | 29.9%                                                             | 26.9%        | 23.6%        | 79.0%        | 73.1%        | 1.12        | 1.03        | 1.16        | 1.05        | 1.28        | 0.002911        |
| <b>Replication analysis using OFFSIDES data</b>                         |                                    |                                     |                                        |                                        |                                           |                                                                       |                                                                   |              |              |              |             |             |             |             |                         |                                    |                                     |                                        |                                        |                                           |                                                                       |                                                                   |              |              |              |              |             |             |             |             |             |                 |
| TOTAL                                                                   | 5523                               | 1230                                | 326                                    | 2940                                   | 1027                                      | 79.0%                                                                 | 74.1%                                                             | 29.5%        | 75.9%        | 25.9%        | 1.22        | 1.08        | 1.32        | 1.14        | 1.52                    | 0.000112548                        | 4998                                | 1003                                   | 317                                    | 2669                                      | 1009                                                                  | 76.0%                                                             | 72.6%        | 27.3%        | 76.1%        | 27.4%        | 1.14        | 1.05        | 1.20        | 1.03        | 1.39        | 0.016452        |
| Random genetics (mean of 1000 randomizations)                           | 5523                               | 1632                                | 523                                    | 2538                                   | 830                                       | 75.7%                                                                 | 75.4%                                                             | 39.1%        | 61.3%        | 24.6%        | 1.01        | 1.01        | 1.02        | 0.90        | 1.16                    | 0.472879439                        | 4998                                | 1425                                   | 515                                    | 2247                                      | 811                                                                   | 73.5%                                                             | 73.5%        | 38.8%        | 61.2%        | 26.5%        | 1.00        | 1.00        | 1.00        | 0.88        | 1.14        | 0.483419        |
| Standard deviation of random genetics                                   | 85                                 | 35                                  | 85                                     | 35                                     | 0.8%                                      | 0.8%                                                                  | 0.5%                                                              | 2.0%         | 2.6%         | 0.5%         | 0.04        | 0.03        | 0.07        | 0.06        | 0.08                    | 0.301098261                        | 79                                  | 34                                     | 79                                     | 34                                        | 0.9%                                                                  | 0.5%                                                              | 2.1%         | 2.6%         | 0.5%         | 0.04         | 0.03        | 0.07        | 0.06        | 0.08        | 0.29747     |                 |
| <b>Analysis of placebo contribution to side effects using AACT data</b> |                                    |                                     |                                        |                                        |                                           |                                                                       |                                                                   |              |              |              |             |             |             |             |                         |                                    |                                     |                                        |                                        |                                           |                                                                       |                                                                   |              |              |              |              |             |             |             |             |             |                 |
| Placebo-controlled side effects                                         | 4809                               | 291                                 | 943                                    | 460                                    | 3115                                      | 23.6%                                                                 | 12.9%                                                             | 38.7%        | 76.8%        | 87.1%        | 1.67        | 1.25        | 2.09        | 1.77        | 2.47                    | 6.61954E-18                        | 4275                                | 198                                    | 798                                    | 379                                       | 2900                                                                  | 19.9%                                                             | 11.6%        | 34.3%        | 78.4%        | 88.4%        | 1.59        | 1.19        | 1.90        | 1.56        | 2.30        | 1.11E-10        |
| All placebo group side effects                                          | 4746                               | 529                                 | 690                                    | 1151                                   | 2376                                      | 43.4%                                                                 | 32.6%                                                             | 31.5%        | 77.5%        | 67.4%        | 1.40        | 1.13        | 1.58        | 1.38        | 1.81                    | 2.32827E-11                        | 4041                                | 330                                    | 590                                    | 910                                       | 2211                                                                  | 35.9%                                                             | 29.2%        | 26.6%        | 78.9%        | 70.8%        | 1.26        | 1.08        | 1.36        | 1.16        | 1.59        | 0.00013         |
| All drug group side effects                                             | 4809                               | 604                                 | 630                                    | 1232                                   | 2343                                      | 48.9%                                                                 | 34.5%                                                             | 32.9%        | 78.8%        | 65.5%        | 1.55        | 1.17        | 1.82        | 1.60        | 2.08                    | 4.12156E-19                        | 4091                                | 386                                    | 544                                    | 966                                       | 2195                                                                  | 41.5%                                                             | 30.6%        | 28.6%        | 80.1%        | 69.4%        | 1.44        | 1.12        | 1.61        | 1.38        | 1.88        | 7.35E-10        |

**Supplementary Table 2.** Analysis of enrichment between genetic phenotypes and side effects in individual organ systems. P value is from Fisher's exact test (two-sided.) PPV, positive predictive value; FOR, false omission rate; TPR, true positive rate; TNR, true negative rate; SEN, sensitivity; SPE, specificity; PPV, positive predictive value; NPV, negative predictive value; LR+, likelihood ratio positive (SEN/1-SPE); iLR-, inverse likelihood ratio negative (SPE/1-SEN)



| side effect modeled | AUC.real.genetics | AUC.no.genetics | median.AUC.random.genetics | CI95.AUC.random.genetics | p       |
|---------------------|-------------------|-----------------|----------------------------|--------------------------|---------|
| heart               | 0.703             | 0.684           | 0.682                      | 0.675-0.695              | < 0.001 |
| metabolism          | 0.706             | 0.701           | 0.691                      | 0.687-0.7                | < 0.001 |
| repro               | 0.731             | 0.72            | 0.712                      | 0.706-0.725              | 0.006   |
| endocrine           | 0.704             | 0.678           | 0.671                      | 0.658-0.695              | 0.007   |
| urologic            | 0.739             | 0.732           | 0.723                      | 0.716-0.736              | 0.007   |
| mental              | 0.712             | 0.716           | 0.702                      | 0.697-0.714              | 0.037   |

**Supplementary Table 4.** Results of cross validation analysis of six off-indication side effect models where genetics was significant in any of the regression models. Distribution of permutation values are shown in **Figure 4** and are reflected in 95% CI values. The p values are derived from the frequency of permutation runs that exceed the AUC of the true model.

| <b>Adverse Event</b>              | <b># drugs</b> | <b>% drugs</b> | <b>UMLS ID</b>    |
|-----------------------------------|----------------|----------------|-------------------|
| headache                          | 1446           | 54.9           | C0018681          |
| nausea                            | 1209           | 45.9           | C0027497          |
| diarrhea                          | 959            | 36.4           | C0011991          |
| emesis                            | 708            | 26.9           | C0042963          |
| dizziness                         | 617            | 23.4           | C0012833,C0042571 |
| fatigue                           | 607            | 23.1           | C0015672          |
| pain                              | 606            | 23.0           | C0030193          |
| rhinopharyngitis                  | 531            | 20.2           | C0027441          |
| upper respiratory tract infection | 498            | 18.9           | C0041912          |
| constipation                      | 462            | 17.5           | C0009806          |
| vertigo                           | 440            | 16.7           | C0042571          |
| skin rash                         | 422            | 16.0           | C0015230          |
| abdominal pain                    | 410            | 15.6           | C0000737          |
| gastrointestinal disease          | 388            | 14.7           | C0017178          |
| fever                             | 386            | 14.7           | C0015967          |
| back pain                         | 381            | 14.5           | C0004604          |
| pruritus                          | 381            | 14.5           | C0033774          |
| drowsiness                        | 368            | 14.0           | C2830004          |
| death                             | 353            | 13.4           | C1306577          |
| insomnia                          | 339            | 12.9           | C0917801          |
| cough                             | 332            | 12.6           | C0010200          |
| dyspepsia                         | 327            | 12.4           | C0013395          |
| arthralgia                        | 322            | 12.2           | C0003862          |
| infectious disease                | 316            | 12.0           | C0009450          |
| urinary tract infection           | 307            | 11.7           | C0042029          |
| hypertension                      | 304            | 11.5           | C0020538          |
| edema                             | 285            | 10.8           | C0013604          |

**Supplementary Table 5.** Common side effects removed from analysis.

| <b>enteral</b>                                                          | <b>parenteral</b>                                                                                                                                                                                                                                                                                                                                                                                                                                                                                        | <b>topical</b>                                                                                                                                                            | <b>other</b>                                                                                                                                                                                                                                                                                                                                                                                                                                                                                                                                                                                                                                                                                         |
|-------------------------------------------------------------------------|----------------------------------------------------------------------------------------------------------------------------------------------------------------------------------------------------------------------------------------------------------------------------------------------------------------------------------------------------------------------------------------------------------------------------------------------------------------------------------------------------------|---------------------------------------------------------------------------------------------------------------------------------------------------------------------------|------------------------------------------------------------------------------------------------------------------------------------------------------------------------------------------------------------------------------------------------------------------------------------------------------------------------------------------------------------------------------------------------------------------------------------------------------------------------------------------------------------------------------------------------------------------------------------------------------------------------------------------------------------------------------------------------------|
| buccal<br>nasogastric<br>oral<br>oro-pharyngeal<br>rectal<br>sublingual | epidural<br>infiltration<br>intraarterial<br>intraarterial (hepatic artery)<br>intraarticular<br>intracoronary<br>intracutaneous<br>intra-dermal<br>intralymphatic<br>intramuscular<br>intramuscular (cremaster)<br>intramuscular (deltoid)<br>intramuscular (gluteal)<br>intraspinal<br>intrathecal<br>intrathecal, lumbar<br>intravenous<br>intravenous (portal)<br>parenteral<br>subcutaneous<br>subcutaneous (abdomen)<br>subcutaneous (arm)<br>subcutaneous (thigh)<br>transarterial<br>transdermal | dental<br>inhaled<br>intranasal<br>intranasal spray<br>mouth rinse<br>ophthalmic<br>percutaneous<br>topical<br>topical (buccal)<br>topical (ophthalmic)<br>topical (otic) | instillation, bladder<br>instillation, intravesical<br>intrabone<br>intra-bronchial<br>intracameral<br>intracardiac<br>intracavernosal<br>intracerebral<br>intracerebroventricular<br>intradiscal<br>intra-gastric<br>intra-locus coeruleus<br>intramammary<br>intramyocardial<br>intranodal<br>intraocular<br>intraotic<br>intrapericardial<br>intraperitoneal<br>intrapleural<br>intraprostatic<br>intra-striatal<br>intratendinous<br>intratracheal<br>intratumor<br>intratumoral<br>intratympanic<br>intrauterine<br>intravaginal<br>intraventricular<br>intravitreous<br>percutaneous hepatic perfusion<br>peritumoral<br>subconjunctiva<br>subgingivally<br>subretinal<br>subtenon<br>urethral |

**Supplementary Table 6.** Coding of delivery route.



| Organ System Abbreviation | MedDRA System Organ Class (SOC) Term                 | UMLS id  | Comment                   |
|---------------------------|------------------------------------------------------|----------|---------------------------|
| blood                     | Blood and lymphatic system disorders                 | C0851353 |                           |
| heart                     | Diseases, Heart                                      | C0018799 |                           |
| congenital                | Congenital, familial and genetic disorders           | C0851352 |                           |
| ear                       | Ear and labyrinth disorders                          | C0851354 |                           |
| endocrine                 | System Diseases, Endocrine                           | C0014130 |                           |
| eye                       | Diseases, Eye                                        | C0015397 |                           |
| gi                        | Diseases, Gastrointestinal                           | C0017178 |                           |
| general                   | General disorders and administration site conditions | C0851362 | mapped to other SOC terms |
| hepatobiliary             | Hepatobiliary disease NOS                            | C0267792 |                           |
| immune                    | Diseases, Immune System                              | C0021053 |                           |
| infection                 | Diseases, Communicable                               | C0009450 |                           |
| injury                    | Injury, poisoning and procedural complications       | C0947733 | mapped to other SOC terms |
| investigation             | Investigation NOS                                    | C1261322 | mapped to other SOC terms |
| metabolism                | Metabolism and nutrition disorders                   | C0851358 |                           |
| musculoskeletal           | Musculoskeletal and connective tissue disorders      | C0263660 |                           |
| neoplasm                  | Neoplasm NOS                                         | C0027651 |                           |
| nervous                   | Diseases, Nervous System                             | C0027765 |                           |
| pregnancy                 | Pregnancy, puerperium and perinatal conditions       | C0851363 |                           |
| mental                    | Mental disorder                                      | C0004936 |                           |
| urologic                  | Diseases, Urologic                                   | C0042075 |                           |
| repro                     | Reproductive system and breast disorders             | C0851366 |                           |
| respiratory               | Respiratory, thoracic and mediastinal disorders      | C0851355 |                           |
| skin                      | Skin and subcutaneous tissue disorders               | C0178298 |                           |
| social                    | Social circumstances                                 | C0851364 | exclude from study        |
| procedures                | Surgical and medical procedures                      | C1948041 | exclude from study        |
| vascular                  | Diseases, Vascular                                   | C0042373 |                           |

**Supplementary Table 7.** MedDRA System Organ Class (SOC) terms inclusion and remapping criteria.

|                                                    |                | This study<br>(human x 21<br>organ systems) | IQ Consortium (3<br>species x 12<br>organ systems) |
|----------------------------------------------------|----------------|---------------------------------------------|----------------------------------------------------|
| <b><u>Translatability of positive findings</u></b> |                |                                             |                                                    |
| Number of species-phenotype combinations with:     | LR+ $\leq$ 1   | 1                                           | 7                                                  |
|                                                    | 1 < LR+ < 10   | 20                                          | 22                                                 |
|                                                    | LR+ $\geq$ 10  | 0                                           | 4                                                  |
| Sensitivity                                        |                | 30%                                         | 48%                                                |
| PPV                                                |                | 30%                                         | 43%                                                |
| <b><u>Translatability of negative findings</u></b> |                |                                             |                                                    |
| Number of species-phenotype combinations with:     | iLR- $\leq$ 1  | 1                                           | 10                                                 |
|                                                    | 1 < iLR- < 10  | 20                                          | 25                                                 |
|                                                    | iLR- $\geq$ 10 | 0                                           | 0                                                  |
| Specificity                                        |                | 80%                                         | 84%                                                |
| NPV                                                |                | 81%                                         | 86%                                                |

**Supplementary Table 8.** Comparison of summary statistics between results of this study and the results of the IQ Consortium (Monticello *et al.*, 2017). PPV, positive predictive value. NPV, negative predictive value. LR+, positive likelihood ratio. iLR-, inverse negative likelihood ratio.

| Model (Side effect predicted) | Variable                     | Model: glm (all data used) |          |          |          |          | Model: glm (only off-indication side effects used) |          |          |          |          | Model: glmnet (all data used) |          | Model: glmnet (only off-indication data used) |          |          |          |             |             |
|-------------------------------|------------------------------|----------------------------|----------|----------|----------|----------|----------------------------------------------------|----------|----------|----------|----------|-------------------------------|----------|-----------------------------------------------|----------|----------|----------|-------------|-------------|
|                               |                              | beta                       | 95% CI   | OR       | 95% CI   | p        | beta                                               | 95% CI   | OR       | 95% CI   | p        | beta                          | OR       | beta                                          | OR       |          |          |             |             |
| blood                         | gen_omim_blood_yes           | 0.162092                   | -0.3047  | 0.621131 | 1.175968 | 0.737347 | 1.861032                                           | 0.491958 | 0.091146 | -0.42316 | 0.59299  | 1.095429                      | 0.654972 | 1.80939                                       | 0.724693 | NA       | NA       | NA          | NA          |
| heart                         | gen_omim_heart_yes           | 0.709114                   | 0.270634 | 1.147718 | 2.03219  | 1.310796 | 3.1493                                             | 0.001505 | 0.838638 | 0.359089 | 1.316276 | 2.313214                      | 1.432024 | 3.729507                                      | 0.000586 | 0.287803 | 1.333495 | 0.325952305 | 1.385349293 |
| congenital                    | gen_omim_congenital_yes      | 0.935395                   | -0.26439 | 2.229239 | 2.548219 | 0.767676 | 9.292789                                           | 0.13694  | 2.345718 | 0.124561 | 5.306846 | 10.44077                      | 1.132651 | 201.7131                                      | 0.063    | NA       | NA       | NA          | NA          |
| ear                           | gen_omim_ear_yes             | 0.184921                   | -1.08308 | 1.283147 | 1.203124 | 0.338553 | 3.607978                                           | 0.735659 | -0.01987 | -1.39101 | 1.135715 | 0.980325                      | 0.248823 | 3.113398                                      | 0.974913 | NA       | NA       | NA          | NA          |
| endocrine                     | gen_omim_endocrine_yes       | 0.952153                   | 0.421856 | 1.482671 | 2.591283 | 1.524789 | 4.404696                                           | 0.000426 | 1.196117 | 0.478165 | 1.907841 | 3.307249                      | 1.613112 | 6.738521                                      | 0.000998 | 0.217877 | 1.243434 | 0.154896338 | 1.167536926 |
| eye                           | gen_omim_eye_yes             | -0.06875                   | -0.63011 | 0.477691 | 0.933563 | 0.532535 | 1.612347                                           | 0.807445 | -0.15367 | -0.79461 | 0.464039 | 0.857556                      | 0.451755 | 1.590485                                      | 0.612354 | NA       | NA       | NA          | NA          |
| gi                            | gen_omim_gi_yes              | -0.29415                   | -0.65022 | 0.057828 | 0.745167 | 0.521299 | 1.059533                                           | 0.10319  | -0.10457 | -0.4915  | 0.27835  | 0.900714                      | 0.611708 | 1.320948                                      | 0.594114 | NA       | NA       | NA          | NA          |
| hepatobiliary                 | gen_omim_hepatobiliary_yes   | -0.293                     | -1.1182  | 0.479707 | 0.746022 | 0.326867 | 1.615602                                           | 0.470619 | -0.64547 | -1.68957 | 0.280241 | 0.524418                      | 0.1846   | 1.323449                                      | 0.195131 | NA       | NA       | NA          | NA          |
| immune                        | gen_omim_immune_yes          | 0.278185                   | -0.14869 | 0.698659 | 1.320731 | 0.861839 | 2.010873                                           | 0.197499 | 0.046765 | -0.68232 | 0.73583  | 1.047875                      | 0.505443 | 2.087213                                      | 0.896641 | NA       | NA       | NA          | NA          |
| infection                     | gen_omim_infection_yes       | 0.233047                   | -0.26189 | 0.722432 | 1.262441 | 0.769594 | 2.059435                                           | 0.352636 | 0.238231 | -0.29628 | 0.766419 | 1.269002                      | 0.743579 | 2.152046                                      | 0.378714 | NA       | NA       | NA          | NA          |
| metabolism                    | gen_omim_metabolism_yes      | 0.636062                   | 0.298069 | 0.97566  | 1.889027 | 1.347254 | 2.652917                                           | 0.000231 | 0.527928 | 0.08995  | 0.965871 | 1.695416                      | 1.09412  | 2.627075                                      | 0.018008 | 0.084695 | 1.088385 | 0.011376563 | 1.011441523 |
| musculoskeletal               | gen_omim_musculoskeletal_yes | 0.214049                   | -0.09963 | 0.527754 | 1.238684 | 0.905175 | 1.69512                                            | 0.180807 | 0.2859   | -0.08112 | 0.653439 | 1.33096                       | 0.922084 | 1.92214                                       | 0.126746 | NA       | NA       | 0.039245178 | 1.040025443 |
| neoplasm                      | gen_omim_neoplasm_yes        | 0.533812                   | -0.13093 | 1.188392 | 1.705421 | 0.87728  | 3.281801                                           | 0.111976 | 0.533812 | -0.13093 | 1.188392 | 1.705421                      | 0.87728  | 3.281801                                      | 0.111976 | NA       | NA       | NA          | NA          |
| nervous                       | gen_omim_nervous_yes         | -0.01654                   | -0.3053  | 0.271444 | 0.983596 | 0.736905 | 1.311857                                           | 0.910448 | 0.267309 | -0.09063 | 0.625795 | 1.306444                      | 0.913354 | 1.869732                                      | 0.14326  | NA       | NA       | NA          | NA          |
| pregnancy                     | gen_omim_pregnancy_yes       | 0.311179                   | -0.01433 | 1.568157 | 1.365033 | 0.362644 | 4.797795                                           | 0.632798 | 0.559077 | -0.48173 | 1.924256 | 1.749058                      | 0.622443 | 6.850052                                      | 0.462027 | NA       | NA       | NA          | NA          |
| mental                        | gen_omim_mental_yes          | 0.353576                   | -0.01715 | 0.723029 | 1.424151 | 0.982991 | 2.060665                                           | 0.609296 | 0.371056 | -0.08904 | 0.82766  | 1.449264                      | 0.914806 | 2.729959                                      | 0.112109 | 0.163284 | 1.177371 | NA          | NA          |
| urologic                      | gen_omim_urologic_yes        | 0.591618                   | 0.115107 | 1.06582  | 1.806909 | 1.121993 | 2.903218                                           | 0.014587 | 0.723119 | 0.181844 | 1.260413 | 2.060851                      | 1.199427 | 3.526876                                      | 0.00846  | 0.11313  | 1.119777 | 0.296989895 | 1.3458017   |
| repro                         | gen_omim_repro_yes           | 0.993491                   | 0.428062 | 1.551227 | 2.700646 | 1.534282 | 4.717257                                           | 0.000513 | 0.913327 | 0.27293  | 1.538904 | 2.492601                      | 1.313808 | 4.65948                                       | 0.004574 | 0.575129 | 1.777359 | 0.328021306 | 1.38821855  |
| respiratory                   | gen_omim_respiratory_yes     | 0.142477                   | -0.21035 | 0.493275 | 1.153126 | 0.8103   | 1.637671                                           | 0.427019 | 0.027181 | -0.36721 | 0.41789  | 1.027553                      | 0.692664 | 1.518753                                      | 0.891956 | NA       | NA       | NA          | NA          |
| skin                          | gen_omim_skin_yes            | -0.07187                   | -0.45144 | 0.303625 | 0.930655 | 0.636711 | 1.359761                                           | 0.708848 | -0.08137 | -0.49811 | 0.329332 | 0.921856                      | 0.607676 | 1.590039                                      | 0.699591 | NA       | NA       | NA          | NA          |
| vascular                      | gen_omim_vascular_yes        | 0.196397                   | -0.13257 | 0.524479 | 1.21701  | 0.875839 | 1.689579                                           | 0.241024 | 0.086637 | -0.3011  | 0.47102  | 1.090501                      | 0.740006 | 1.601266                                      | 0.65975  | 0.016293 | 1.016426 | NA          | NA          |
| blood                         | gen_omim_blood_no            | -0.06826                   | -0.41805 | 0.281478 | 0.934015 | 0.658332 | 1.325087                                           | 0.701802 | -0.07765 | -0.44624 | 0.290561 | 0.925292                      | 0.640033 | 1.337178                                      | 0.679215 | NA       | NA       | NA          | NA          |
| heart                         | gen_omim_heart_no            | 0.18758                    | -0.08777 | 0.464246 | 1.206327 | 0.91597  | 1.590814                                           | 0.182585 | 0.217087 | -0.08664 | 0.522831 | 1.242452                      | 0.917011 | 1.686795                                      | 0.162311 | NA       | NA       | NA          | NA          |
| congenital                    | gen_omim_congenital_no       | 0.556453                   | -0.75215 | 1.875506 | 1.744474 | 0.471353 | 6.524119                                           | 0.400224 | -0.429   | -3.69902 | 2.711292 | 0.651157                      | 0.024748 | 15.04871                                      | 0.786016 | NA       | NA       | NA          | NA          |
| ear                           | gen_omim_ear_no              | 0.283705                   | -0.36565 | 0.951975 | 1.328042 | 0.693746 | 2.59082                                            | 0.396474 | 0.290216 | -0.3766  | 0.977593 | 1.336716                      | 0.686187 | 2.658051                                      | 0.398499 | NA       | NA       | NA          | NA          |
| endocrine                     | gen_omim_endocrine_no        | 0.435031                   | 0.012475 | 0.863699 | 1.545012 | 1.012554 | 2.371919                                           | 0.044802 | 0.488916 | -0.04701 | 1.03844  | 1.630547                      | 0.954077 | 2.824806                                      | 0.076558 | NA       | NA       | NA          | NA          |
| eye                           | gen_omim_eye_no              | 0.047614                   | -0.35236 | 0.449448 | 1.048766 | 0.703028 | 1.567447                                           | 0.815684 | 0.031798 | -0.42396 | 0.489774 | 1.032309                      | 0.654445 | 1.631947                                      | 0.891298 | NA       | NA       | NA          | NA          |
| gi                            | gen_omim_gi_no               | -0.19492                   | -0.47221 | 0.081635 | 0.822901 | 0.623622 | 1.08506                                            | 0.167483 | -0.08399 | -0.38774 | 0.219655 | 0.919442                      | 0.678591 | 1.245646                                      | 0.587535 | NA       | NA       | NA          | NA          |
| hepatobiliary                 | gen_omim_hepatobiliary_no    | -0.15745                   | -0.59371 | 0.28023  | 0.854317 | 0.552273 | 1.323434                                           | 0.479237 | -0.01814 | -0.48015 | 0.448807 | 0.982025                      | 0.618691 | 1.566442                                      | 0.938856 | NA       | NA       | NA          | NA          |
| immune                        | gen_omim_immune_no           | 0.179531                   | -0.16292 | 0.523773 | 1.196655 | 0.849661 | 1.688386                                           | 0.305004 | 0.034616 | -0.44613 | 0.522257 | 1.035222                      | 0.6401   | 1.685828                                      | 0.888343 | NA       | NA       | NA          | NA          |
| infection                     | gen_omim_infection_no        | 0.035065                   | -0.24121 | 0.312199 | 1.035687 | 0.785677 | 1.366426                                           | 0.803738 | -0.02538 | -0.31735 | 0.267362 | 0.974942                      | 0.728073 | 1.306513                                      | 0.864824 | NA       | NA       | NA          | NA          |
| metabolism                    | gen_omim_metabolism_no       | 0.197369                   | -0.14211 | 0.536591 | 1.218193 | 0.867528 | 1.701167                                           | 0.253936 | 0.22929  | -0.1657  | 0.624887 | 1.257707                      | 0.847297 | 1.868034                                      | 0.255031 | NA       | NA       | NA          | NA          |
| musculoskeletal               | gen_omim_musculoskeletal_no  | -0.08626                   | -0.39685 | 0.222583 | 0.917359 | 0.672435 | 1.2493                                             | 0.584903 | -0.08239 | -0.44194 | 0.274764 | 0.92091                       | 0.642789 | 1.31622                                       | 0.651931 | NA       | NA       | NA          | NA          |
| neoplasm                      | gen_omim_neoplasm_no         | -0.20252                   | -0.69404 | 0.287333 | 0.816667 | 0.499554 | 1.332861                                           | 0.417514 | -0.20252 | -0.69404 | 0.287333 | 0.816667                      | 0.499554 | 1.332861                                      | 0.417514 | NA       | NA       | NA          | NA          |
| nervous                       | gen_omim_nervous_no          | 0.123526                   | -0.17412 | 0.420969 | 1.131479 | 0.8402   | 1.523437                                           | 0.415581 | 0.209155 | -0.13489 | 0.553539 | 1.232635                      | 0.873812 | 1.739397                                      | 0.233317 | NA       | NA       | NA          | NA          |
| pregnancy                     | gen_omim_pregnancy_no        | -0.21143                   | -1.1365  | 0.706452 | 0.809426 | 0.32094  | 2.026786                                           | 0.650078 | -0.24671 | -1.24838 | 0.746712 | 0.781365                      | 0.286968 | 2.11005                                       | 0.624435 | NA       | NA       | NA          | NA          |
| mental                        | gen_omim_mental_no           | 0.076743                   | -0.27227 | 0.426049 | 1.079764 | 0.761648 | 1.531196                                           | 0.666353 | 0.2366   | -0.15859 | 0.634078 | 1.266934                      | 0.85335  | 1.885283                                      | 0.241378 | NA       | NA       | NA          | NA          |
| urologic                      | gen_omim_urologic_no         | -0.06371                   | -0.45245 | 0.325373 | 0.938276 | 0.636068 | 1.384547                                           | 0.747837 | -0.03926 | -0.47496 | 0.39765  | 0.961501                      | 0.621908 | 1.488233                                      | 0.859769 | NA       | NA       | NA          | NA          |
| repro                         | gen_omim_repro_no            | -0.18886                   | -0.62197 | 0.243867 | 0.827903 | 0.536884 | 1.761174                                           | 0.391827 | -0.15285 | -0.62701 | 0.32164  | 0.858262                      | 0.534189 | 1.379388                                      | 0.526901 | NA       | NA       | NA          | NA          |
| respiratory                   | gen_omim_respiratory_no      | 0.017435                   | -0.28374 | 0.318731 | 1.017588 | 0.752966 | 1.375381                                           | 0.909625 | -0.0855  | -0.41672 | 0.245148 | 0.918052                      | 0.659204 | 1.277811                                      | 0.612323 | NA       | NA       | NA          | NA          |
| skin                          | gen_omim_skin_no             | -0.24749                   | -0.54618 | 0.05007  | 0.78076  | 0.579156 | 1.051345                                           | 0.103498 | -0.30631 | -0.63671 | 0.022203 | 0.73616                       | 0.529032 | 1.022451                                      | 0.068186 | NA       | NA       | NA          | NA          |
| vascular                      | gen_omim_vascular_no         | 0.017479                   | -0.25792 | 0.292845 | 1.017632 | 0.772658 | 1.304235                                           | 0.900945 | -0.05025 | -0.3606  | 0.259874 | 0.950993                      | 0.697255 | 1.296766                                      | 0.750731 | NA       | NA       | NA          | NA          |
| blood                         | gen_gwas_blood_yes           | 0.354919                   | -0.14976 | 0.850343 | 1.426065 | 0.860912 | 2.34045                                            | 0.163569 | 0.588198 | 0.038603 | 1.127301 | 1.80074                       | 1.039358 | 3.087131                                      | 0.033845 | NA       | NA       | NA          | NA          |
| heart                         | gen_gwas_heart_yes           | 0.713666                   | 0.258691 | 1.16798  | 2.041461 | 1.295323 | 3.215489                                           | 0.002073 | 0.798489 | 0.300843 | 1.293995 | 2.22218                       | 1.350997 | 3.647328                                      | 0.001604 | 0.326082 | 1.38553  | 0.411220872 | 1.50865854  |
| congenital                    | gen_gwas_congenital_yes      | 1.375561                   | -0.3206  | 2.978908 | 3.957297 | 0.725716 | 19.66634                                           | 0.096448 | -18.9322 | NA       | 132.4311 | 6.00E-09                      | NA       | 3.27E+57                                      | 0.994258 | NA       | NA       | NA          | NA          |
| ear                           | gen_gwas_ear_yes             | -14.9689                   | NA       | 93.37754 | 3.16E-07 | NA       | 3.58E+40                                           | 0.977696 | -14.911  | NA       | 93.39451 | 3.34E-07                      | NA       | 3.64E+40                                      | 0.977782 | NA       | NA       | NA          | NA          |
| endocrine                     | gen_gwas_endocrine_yes       | 0.325005                   | -0.35164 | 0.996775 | 1.384038 | 0.703535 | 2.709529                                           | 0.344111 | -0.2471  | -1.30438 | 0.754428 | 0.781066                      | 0.271339 | 2.126396                                      | 0.6366   | NA       | NA       | NA          | NA          |
| eye                           | gen_gwas_eye_yes             | 0.63102                    | -0.11954 | 1.352384 | 1.879528 | 0.887313 | 3.866634                                           | 0.202303 | 0.276686 | -0.67362 | 1.148453 | 1.318752                      | 0.509861 | 3.15331                                       | 0.549397 | NA       | NA       | NA          | NA          |
| gi                            | gen                          |                            |          |          |          |          |                                                    |          |          |          |          |                               |          |                                               |          |          |          |             |             |
