# Supplementary material for: Phenotypes associated with genes encoding drug targets are predictive of clinical trial side effects
Source: PubMed Central journal article supplement (PMC6450952; doi:10.1038/s41467-019-09407-3), 2019-04-05
Supplement: 41467_2019_9407_MOESM4_ESM.pdf [file 41467_2019_9407_MOESM4_ESM.pdf]

## **Description of Additional Supplementary Information files**

### **Supplementary Data 1.**

Entire data set across 1,819 drugs used for enrichment and regression analysis.

### **Supplementary Data 2.**

Validation dataset using side effects derived from OFFSIDES.

### **Supplementary Data 3.**

Placebo-controlled dataset using side effects derived from AACT. Only side effects enriched in the drug-treatment arm are included.

### **Supplementary Data 4.**

Placebo dataset using side effects derived from AACT. All side effects seen in placebo arms are included.

### **Supplementary Data 5.**

Drug-arm dataset using side effects derived from AACT. All side effects seen in drug-treatment arms are included.
